1 **Title:** A parallel channel of state-dependent sensory signaling from the cholinergic basal  
2 forebrain to the auditory cortex

3 **Authors:** Fangchen Zhu<sup>1</sup>, Sarah E. Elnozahy<sup>1</sup>, Jennifer Lawlor<sup>1</sup> and Kishore V.  
4 Kuchibhotla<sup>1,2,3</sup>

5 <sup>1</sup> Department of Psychological and Brain Sciences, Johns Hopkins University

6 <sup>2</sup> Department of Neuroscience, Johns Hopkins Medical Institute

7 <sup>3</sup> Department of Biomedical Engineering, Johns Hopkins University

8

## 9 **Abstract**

10 Cholinergic basal forebrain (CBF) signaling exhibits multiple timescales of activity with  
11 classic, slow signals related to brain and behavioral states and faster, phasic signals  
12 reflecting behavioral events, including movement and reinforcement. Recent evidence  
13 suggests that the CBF may also exhibit fast, sensory-evoked responses. It remains  
14 unknown, however, whether such sensory signals target the sensory cortex and how they  
15 relate to local functional topography. Moreover, the extent to which fast and slow CBF  
16 activity interact has been largely unexplored. Here, we used simultaneous two-channel,  
17 two-photon imaging of CBF axons and auditory cortical (AC) neurons to reveal that CBF  
18 axons project a robust, non-habituating, and stimulus-specific sensory signal to the AC.  
19 Individual axon segments exhibited heterogeneous but stable tuning to auditory stimuli  
20 allowing stimulus identity to be decoded from the population. However, CBF axons  
21 displayed no tonotopy and their frequency tuning was uncoupled from that of nearby  
22 cortical neurons. Chemogenetic suppression revealed the auditory thalamus as a  
23 principal source of auditory information to the CBF. Finally, slow fluctuations in cholinergic  
24 activity modulated the fast, sensory-evoked signals in the same axons, suggesting that a  
25 multiplexed combination of fast and slow signals is projected from the CBF to the AC.  
26 Taken together, our work demonstrates a novel, non-canonical function of the CBF as a  
27 parallel channel of state-dependent sensory signaling to the sensory cortex that provides  
28 repeated representations of a broad range of sound stimuli at all points on the tonotopic  
29 map.

30

## 31 **Main text**

### 32 **Introduction**

33 The cholinergic basal forebrain (CBF) is the primary source of acetylcholine to the  
34 neocortex, hippocampus, and amygdala<sup>1–5</sup>. CBF signals are implicated in modulating  
35 attention<sup>6–10</sup>, supporting memory encoding<sup>11–15</sup>, and shaping cortical plasticity<sup>16–20</sup>.  
36 However, the classic view of cholinergic neuromodulation as slow, spatially diffuse, and  
37 regionally non-specific is rapidly evolving<sup>21–23</sup>. Anatomical studies have revealed a more  
38 structured organization of projections from the CBF<sup>4,5,24–27</sup> and behavioral studies indicate  
39 that cholinergic neuromodulation operates at multiple timescales to convey different

40 facets of information – slower tonic signals reflect modulations in internal state and  
41 behavioral contexts<sup>28–33</sup> while faster phasic signals are associated with reinforcement<sup>34–</sup>  
42 <sup>37</sup>, movement<sup>35,38–40</sup>, and even sensory cues<sup>41,42</sup>. Fast CBF transients that are regionally-  
43 specific and tied to environmental features may provide a complement to slower, diffuse  
44 signaling of brain state in influencing downstream cortical networks. In particular, native  
45 cholinergic activity in response to neutral sensory cues has previously been observed  
46 using bulk calcium photometry in the basal forebrain<sup>41,42</sup>, suggesting that CBF may relay  
47 sensory information to downstream regions. However, it remains unknown whether such  
48 rapid sensory signaling target sensory cortices, and how it relates to the local functional  
49 topography. Moreover, little is known about the interactions between signaling at different  
50 timescales by the cholinergic system. Here, we used two-color, two-photon microscopy  
51 to record the activity of CBF axons and cortical neurons in the auditory cortex to  
52 investigate the spatiotemporal characteristics of sensory-evoked cholinergic activity.

## 53 **Results**

### 54 **Cholinergic neuromodulation relays sensory information about neutral auditory** 55 **stimuli to auditory cortex**

56 CBF neurons in the basal forebrain have previously been observed to respond to auditory  
57 stimuli<sup>41,42</sup>. We investigated the extent to which cholinergic signals relay auditory  
58 information to the auditory cortex – a downstream cortical target, using two-photon  
59 microscopy to record the activity of CBF axonal projections to the auditory cortex. We  
60 expressed an axon-targeted variant of the genetically encoded calcium indicator  
61 GCaMP6s (axon-GCaMP6s), specifically in cholinergic neurons using a cre-dependent  
62 viral injection in the basal forebrain of ChAT-cre mice and recorded the calcium activity  
63 of CBF axonal projections to the auditory cortex (n = 8; **Fig. 1a-b, Supplementary Fig.**  
64 **1**). Our optical approach allowed us to investigate both the spatial and temporal dynamics  
65 of cholinergic signals in subcellular axonal processes (**Fig. 1c**, example animal). In total,  
66 we identified 15,777 CBF axonal segments in 73 sites across the auditory cortex of 8  
67 animals (n = 9±7 sites per animal). We presented passively-listening head-fixed animals  
68 with 20 repetitions of a white noise stimulus (100ms, 70-80 dB SPL) and observed  
69 multiple axonal segments that were significantly responsive to the neutral stimulus (**Fig.**  
70 **1d-f**). Across 8 animals, 24.8±21.9% of identified axon segments responded to white  
71 noise and were distributed across the auditory cortex (**Fig. 1g**, example animal,  
72 **Supplementary Fig. 2**). We observed that a similar percentage of axon segments  
73 responded to frequency up-sweeps (24.6±18.8%) and down-sweeps (22.3±11.8%)  
74 across the broad extent of the auditory cortex (**Supplementary Fig. 2**).

75 To determine whether the cholinergic transients are sensory responses, we investigated  
76 a few alternative explanations. It is possible that these robust transients indicate the  
77 detection of novel, unexpected stimuli<sup>42,43</sup>. If so, we would expect substantial habituation  
78 after repeated presentations of the same stimulus. We compared the mean response  
79 amplitude of the first five presentations of white noise to that of the last five presentation  
80 and found no significant difference (p = 0.412; **Fig. 1h-i**). Across the 20 presentations of

81 the stimulus, the mean amplitude of the evoked response remained relatively constant,  
82 indicating a non-habituating response that is not only driven by novelty (**Fig. 1j**). Another  
83 possibility is that the phasic transients arise due to micro-movements of the animal when  
84 the auditory stimuli are detected<sup>35,38–40</sup>. We extracted the precise timing of movements  
85 during the recording sessions and found that 81.6% of the evoked signals were not  
86 associated with micro-movements (**Supplementary Fig. 3**). Cholinergic axons thus  
87 exhibit non-habituating phasic transient that is time-locked to stimulus-presentation, all of  
88 which are hallmarks of sensory responses.

89 We further observed that CBF axons displayed different degrees of responsivity to the  
90 complex sounds presented (**Fig. 1k**). Hence, we asked if the cholinergic signals can do  
91 more than just convey the detection of an auditory stimulus and instead play a direct  
92 sensory role relaying information about stimulus identity to the auditory cortex. To test  
93 this, we trained a linear decoder to predict the identity of the complex sound stimuli (white  
94 noise, up-sweep, or down-sweep) from the population activity of all axons. We observed  
95 high accuracy of sound-identity decoding well above 80% (chance level = 33.3%) after  
96 sound presentation suggesting that the cholinergic signal is stimulus-specific (**Fig. 1l**). To  
97 further investigate if the decoding is driven by specific stimuli, we tested each pair of  
98 complex sounds and observed robust pairwise decoding suggesting that phasic,  
99 cholinergic neuromodulation carries identifying information about individual auditory  
100 stimulus (**Fig. 1m**). Robust stimulus-identity decoding was also evident within individual  
101 animals (**Supplementary Fig. 4**). Taken together, our data argue that the CBF provides  
102 a parallel pathway for sensory signals of neutral auditory stimuli to the auditory cortex.

### 103 **Cholinergic axons display heterogeneous frequency-specific response to pure** 104 **tones**

105 The central auditory system exhibits a precise topography of frequency coding (tonotopy)  
106 that begins in the cochlea and propagates through the feedforward hierarchy to the  
107 auditory cortex. Having demonstrated that cholinergic signals also relay auditory  
108 information to the auditory cortex, we asked whether CBF axons exhibit frequency tuning.  
109 We presented half-octave spaced pure tone stimuli in a pseudorandom order to passively  
110 listening animals and recorded sound-evoked phasic responses from individual  
111 cholinergic axon segments ( $n = 15,777$ ). We observed that CBF axons displayed  
112 frequency tuning – axon segments responded robustly and reliably to particular  
113 frequencies and the response amplitude decreased for frequencies further away from  
114 their best frequency (**Fig. 2a-b**). Furthermore, CBF axons exhibited a broad range of  
115 frequency responsivity: 82.7% of all identified axon segments responded to 1-2 of the  
116 presented pure tones, while 0.6% responded to 5-6 tones (**Fig. 2c**). Notably, more axon  
117 segments responded to the frequencies between 4.8kHz to 19kHz compared to  
118 frequencies above 19kHz (**Fig. 2d**).

119 Given the observed heterogeneity in CBF axonal responses to pure tones, we asked  
120 whether cholinergic signals carried information about the frequency of auditory stimuli.  
121 Using the similar approach described above, we trained a multi-class decoder on the eight

122 pure tones and found that tone identity could be decoded well above 50% accuracy  
123 (chance level = 12.5%) from population activity after tone presentation (**Fig. 2e**). Pairwise  
124 decoding of all stimuli pairs revealed that there is robust pairwise decoding for tones in  
125 the low-mid frequency of the mice hearing range suggesting that cholinergic transients  
126 carry information about those frequencies (**Fig. 2f**). Robust stimulus-identity decoding  
127 was also evident in individual animals (**Supplementary Fig. 5**). Taken together, our  
128 results argue that cholinergic axons display tuning properties that allow it to project a  
129 frequency-specific representation of auditory stimuli to the auditory cortex.

### 130 **CBF axons provides repeated representations of a broad range of frequencies at** 131 **all points on the tonotopic map**

132 Frequency-specific responses of CBF axons give rise to the possibility of a finer  
133 topography of functional cholinergic activity in the tonotopically-organized auditory cortex.  
134 Auditory cortical neurons display a tonotopy along the rostro-caudal axis<sup>44,45</sup> which  
135 presents a powerful basis to compare the organizational specificity of functional  
136 cholinergic tuning. We used two-color, two-photon microscopy of CBF axons and cortical  
137 neurons to investigate whether the frequency tuning of cholinergic projections to the  
138 auditory cortex displayed any spatial organization and the relation between cholinergic  
139 tuning and the underlying cortical tonotopy. First, we expressed axon-GCaMP6s in CBF  
140 neurons of ChAT-cre mice that also expressed the red fluorescent calcium indicator,  
141 jRGECO1a, in auditory cortical neurons (see Methods). Using two-photon microscopy,  
142 we identified cholinergic axon segments (green, axon-GCaMP6s) innervating the primary  
143 auditory cortex (red, jRGECO1a) (**Fig. 3a-b**, example animal). We quantified the change  
144 in best frequency of these axon segments and observed no significant changes along the  
145 rostro-caudal axis (**Fig. 3c-d**, example site). This is in stark contrast with the striking  
146 tonotopic gradient found in cortical neurons in the primary auditory cortex recorded in  
147 animals expressing a similar calcium indicator (GCaMP6f) in auditory cortical neurons  
148 (**Fig. 3e, Supplementary Fig. 6**). These data suggest that cholinergic axons display  
149 minimal tonotopy compared to cortical neurons in the primary auditory cortex.

150 However, it is possible that the responses of local axonal segments may overlap with the  
151 preferred frequencies of adjacent auditory cortical neurons. Hence, we compared the  
152 tuning of auditory cortical neurons and their nearby cholinergic axons directly. We  
153 identified 419 tone-responsive cortical neurons and their respective nearby axon  
154 segments in 6 animals (**Fig. 3b**, example animal). We found many single-peak neurons  
155 that were tuned to particular frequencies as expected (**Fig. 3f-g**). Interestingly, local axon  
156 segments were not co-tuned with the cortical neuron (**Fig. 3f-g**), but were instead  
157 responsive to a wider range of frequencies (**Fig. 3h**). When we compared the tuning  
158 profile of all the auditory cortical neurons with their nearby axons, we observed that,  
159 regardless of the tuning of the cortical neuron, the local cholinergic axon segments  
160 responded most to frequencies between 4.8kHz to 19kHz (**Fig. 3i**), whereas the local  
161 cortical neurons tuning was more similar (**Supplementary Fig. 7**). These data reveal that  
162 the sensory information relayed by CBF axons are largely uncoupled from cortical

163 neuronal tuning, thereby providing a scaffold for interaction between parallel streams of  
164 sensory information to the auditory cortex.

### 165 **The medial geniculate body sends auditory information to the cholinergic basal** 166 **forebrain**

167 Our findings that cholinergic axons relay auditory information to the cortex raise the  
168 question of where along the ascending auditory pathway is the source of auditory  
169 information to the CBF. Previous anatomical studies have revealed that the CBF receives  
170 dense innervations from the medial geniculate body in the thalamus ('auditory  
171 thalamus')<sup>3,46</sup>. We investigated whether the auditory thalamus relays auditory information  
172 to the CBF. We performed chemogenetic suppression of the auditory thalamus using  
173 inhibitory designer receptors exclusively active by designer drugs (DREADDs) hM4Di and  
174 examined its effect on the tuning response of cholinergic axons in the auditory cortex (**Fig.**  
175 **4a, Supplementary Fig. 8**). Consistent with the findings above, cholinergic projections  
176 to the auditory cortex in these animals displayed robust evoked responses to pure-tones  
177 (**Fig. 4b-c**). Intraperitoneal injection of clozapine N-oxide (CNO) suppressed activity in  
178 the medial geniculate body, which we confirmed by observing attenuated sound-evoked  
179 responses in cortical neurons (**Supplementary Fig. 9**). MGB suppression resulted in  
180 marked reduction of percentage of responsive CBF axons (after saline injection:  
181  $59.9 \pm 11.2\%$ , after CNO injection:  $37.3 \pm 18.0\%$ ,  $p < 0.05$ ) and a significant attenuation of  
182 sound-evoked CBF axonal responses ( $F(1,48) = 27.67$ ,  $p < 0.001$ ); **Fig. 4b-d**).

183 It is also possible that the auditory thalamus relays information to the basal forebrain  
184 through the auditory cortex. To test that possibility, we chemogenetically suppressed the  
185 auditory cortex while recording cholinergic axonal response to pure tones (**Fig. 4e,**  
186 **Supplementary Fig. 8**). Intraperitoneal injection of CNO attenuated sound-evoked  
187 responses in auditory cortical neurons (**Supplementary Fig. 9**) but did not affect  
188 percentage of responsive CBF axons (after saline injection:  $50.5 \pm 16.8\%$ , after CNO  
189 injection:  $50.0 \pm 35.6\%$ ,  $p = 0.958$ ) or sound-evoked responses of CBF axons ( $F(1,64) =$   
190  $0.01$ ,  $p = 0.908$ ) suggesting that the auditory cortex plays a minimal role in auditory  
191 information relay to the basal forebrain (**Fig. 4f-h**). These data together point to the  
192 auditory thalamus as a primary source of auditory input to the CBF.

### 193 **Tonic state-dependent cholinergic activity modulates phasic responses**

194 The classic view of cholinergic neuromodulation proposes that the slow, diffuse signals  
195 from the CBF is a reflection of brain and behavioral states<sup>28-33</sup>. However, it is unknown  
196 how these tonic signals affect phasic transients from the same cholinergic neurons. We  
197 investigated the relation between phasic sensory-evoked responses and tonic state-  
198 dependent activity from the CBF using our optical approach which allowed us to detect  
199 changes in cholinergic activity at multiple timescales. During our recordings, we observed  
200 large endogenous fluctuations of baseline tonic signals of which 24.6% were associated  
201 with a movement within 0.2s of the onset of the change. These tonic fluctuations were  
202 highly, but not always, correlated with movement of the animal ( $p < 0.001$ ; **Fig. 5a-b**). Tonic

203 cholinergic activity was also highly correlated between axon segments in the same  
204 recording session, suggesting that the fluctuations were network-wide ( $p < 0.001$ ; **Fig. 5c-**  
205 **e**) rather than in a specific sub-population. These results argue that tonic fluctuations may  
206 reflect a global change in behavioral and brain state of the animal. This global change  
207 was also reflected in the baseline activity of the cortical network as we observed a striking,  
208 temporally-correlated change in baseline cortical and axonal activity suggesting coupling  
209 between state-level changes in cortical networks and tonic cholinergic neuromodulation  
210 ( $p < 0.001$ ; **Supplementary Fig. 10**).

211 We next investigated how changes in baseline activity modulated sensory-evoked  
212 cholinergic responses. We observed that at high tonic epochs, the mean amplitudes of  
213 sound-evoked responses were significantly attenuated (**Fig. 5f**). Importantly, tonic  
214 cholinergic activity was not binary; instead, we observed a continuum of baseline activity.  
215 When we compared evoked responses to the white noise stimulus across this range of  
216 baseline cholinergic levels, we found that the amplitude of phasic cholinergic responses  
217 increased as tonic cholinergic activity ramped up to an optimal ‘sweet-spot’ and any  
218 further increase in tonic cholinergic activity led to a decrease in sound-evoked responses  
219 (**Fig. 5G-H**). Similar modulatory effects of tonic cholinergic activity were observed for pure  
220 tones and up- and down-sweeps stimuli (**Supplementary Fig. 11**). These results suggest  
221 that network-wide tonic changes in cholinergic activity (which are linked to brain and  
222 behavioral states) strongly modulates stimulus-specific sensory information relayed by  
223 phasic cholinergic signals.

## 224 **Discussion**

225 We systematically characterized sensory-evoked responses of CBF projections to the  
226 auditory cortex. Using two-photon imaging of cholinergic axonal projections, we observed  
227 robust and non-habituating responses to auditory stimuli widely across the auditory cortex.  
228 Cholinergic sensory responses were not homogeneous, as individual axon segments  
229 displayed heterogeneous but stable tuning to pure tones. This heterogeneity allowed us  
230 to decode stimulus identity from axonal activity at a population level. Despite the response  
231 heterogeneity, cholinergic axon responses were not tonotopically organized and were  
232 largely uncoupled from the tuning of nearby cortical neurons. Chemogenetic suppression  
233 also revealed that the auditory thalamus is a primary source of auditory information from  
234 the ascending auditory pathway although this could be supplemented by inputs from  
235 earlier auditory regions (e.g. inferior colliculus or auditory brainstem). Lastly, we observed  
236 that endogenous changes in tonic cholinergic activity, reflecting both behavioral and brain  
237 states, modulates phasic sensory signaling of the CBF.

238 Our study demonstrates that sound-evoked cholinergic transients (1) are stably driven by  
239 repeated presentation of sounds and not merely associated with novelty or movement,  
240 (2) are intrinsically present even in the absence of behavioral conditioning, (3) encode  
241 readily the identity of the stimulus. These features argue that the CBF provides a parallel  
242 sensory channel to the auditory cortex. Interestingly, despite the heterogeneity and  
243 stimulus-specific encoding, cholinergic innervation is not tonotopically-organized and is

244 uncoupled from cortical neural tuning. This spatial decorrelation of the parallel cholinergic  
245 sensory signal and canonical feedforward auditory signal could help calibrate cortical  
246 responses and provide a powerful substrate for experience-dependent cortical plasticity.  
247 Previous studies have shown that pairing external stimulation of basal forebrain  
248 cholinergic neurons with pure tones can induce long-lasting shifts in frequency tuning of  
249 cortical neurons<sup>16–19</sup>, a process achieved through the disinhibition of microcircuits by  
250 acetylcholine<sup>18,47</sup>. Our demonstration that cholinergic projections to the auditory cortex  
251 display intrinsic sensory responses that overlap temporally with cortical neuronal  
252 responses may provide an ecologically plausible mechanism for cortical plasticity based  
253 on sensory information from the environment. Notably, the decorrelation in tuning  
254 provides repeated representations of a broad range of sound stimuli at all points on the  
255 cortical tonotopic map, allowing cortical neurons to receive cholinergic inputs at  
256 frequencies outside of their best frequencies. This parallel channel could enable shifts in  
257 cortical tuning to behaviorally relevant stimuli which may be particularly powerful at the  
258 shoulders of a neuron's tuning curve.

259 Our work also calls into question the classic dichotomy between phasic and tonic modes  
260 of neuromodulation<sup>22,23</sup>. The cognitive role of acetylcholine has traditionally been  
261 considered from a slow, spatially diffuse perspective based on a canonical volume  
262 transmission. Recent studies using modern experimental techniques, however, have  
263 revealed that cholinergic activity operates at multiple timescales with a more region-  
264 specific functional architecture<sup>6,25,27,32</sup>. Our results argue that different timescales of  
265 cholinergic activity interact in the CBF – slow cholinergic signals which indicates brain  
266 and behavioral states have profound effects on fast sensory-evoked cholinergic transients.  
267 The interaction between different modes of cholinergic signaling potentially follows a  
268 classical Yerkes-Dodson inverted-U relationship<sup>29,48</sup> in which phasic sensory signals are  
269 attenuated when tonic baseline cholinergic level is too low or high, such as when the  
270 animal is overly aroused, locomoting, or disengaged. Taken together, our results suggest  
271 that the CBF is a self-regulating multiplexer, receiving sensory or task-relevant  
272 information, modulating it based on the state of the animal, and sending an integrated  
273 combination of fast and slow signal to downstream regions. Our findings serve to expand  
274 current theoretical models on the role of CBF in learning, task engagement, and decision-  
275 making and lay the groundwork for future investigation of the behavioral relevance of  
276 sensory cholinergic neuromodulation.

277

## 278 **Acknowledgements**

279 We would like to thank CC, RCF, CH, DL, and SPM for helpful comments on the  
280 manuscript and CD and ZZ for assistance with cortical tonotopic measurements. This  
281 work was supported by grants from the NIH R01 DC018650, R00DC015014, NSF  
282 CAREER 2145247 and BBRF NARSAD to KVK and a JHU Science of Learning Institute  
283 Fellowship to FZ.

284

## 285 **Author contributions**

286 KVK and FZ designed the study. FZ and SE performed experiments. FZ analyzed the  
287 data. JL provided analytical and conceptual advice. KVK and FZ wrote the manuscript.

288

## 289 **Methods**

### 290 **Animals**

291 All procedures were approved by Johns Hopkins University Animal Care and Use  
292 Committee. Male and female transgenic mice (ChAT-cre, ChAT-cre/jRGECO1a) between  
293 6-16 weeks were used for the experiments. All experiments (passive recording and  
294 chemogenetic suppression) used ChAT-cre mice unless stated otherwise. ChAT-cre mice  
295 were obtained from The Jackson Laboratory (Stock No.: 006410) and bred in-house.  
296 ChAT-cre/jRGECO1a mice were bred in-house by crossing homozygous female ChAT-  
297 cre mice and hemizygous male jRGECO1a obtained from The Jackson Laboratory (Stock  
298 No.: 030526). First generation offspring were heterozygous for ChAT-cre and hemizygous  
299 for jRGECO1a and subsequent generation offspring were homozygous for ChAT-cre and  
300 hemizygous for jRGECO1a. Offspring genotypes were confirmed by PCR (Lucigen  
301 EconoTaq Plus GREEN 2X) and both heterozygous and homozygous ChAT-  
302 cre/jRGECO1a mice were used in the experiments and no phenotypic difference were  
303 observed.

304

### 305 **Surgical procedures**

306 Mice were anesthetized with isoflurane (5.0% at induction, 2.0% during surgery) and their  
307 body temperature was maintained at 35°C throughout the surgery. For all surgeries, a  
308 3mm craniotomy was performed over the temporal lobe (centered 1.75mm anterior to the  
309 lambda structure on the ridge line) to expose the auditory cortex. In a subset of ChAT-cre  
310 animals (n = 4) that do not endogenously express jRGECO1a in cortical neurons, an  
311 adeno-associated virus (AAV) vector encoding the calcium indicator jRGECO1a<sup>49</sup> (~0.8-  
312 1.5µL, AAV1-syn-jRGECO1a, addgene) was injected in layer 2/3 in the left A1 to express  
313 calcium indicator in auditory cortical neurons. Expression of viral jRGECO1a was  
314 confirmed with two-photon microscopy. A 3mm circular glass window (Warner  
315 Instruments) was secured in place over the exposed brain with a dental cement and Crazy  
316 Glue mixture. For all animals, we carefully leveled the head of the animal and drilled a  
317 small burr hole above the basal forebrain (AP: -0.5 mm; ML: 1.8 mm; DV: 4.5 mm from  
318 bregma) and an AAV vector encoding the calcium indicator axon-GCaMP6s (1µL, AAV5-  
319 syn-flex-axon-GCaMP6s, addgene) was injected into the basal forebrain to express  
320 GCaMP6s in cholinergic neurons and their axonal projections. In animals used for  
321 chemogenetic suppression experiments, an inhibitory DREADDs hM4Di packaged into



322 an AAV (0.8 $\mu$ L, AAV5-CaMKII-hM4D(Gi)-mCherry, addgene) was injected into the left  
323 medial geniculate body (n = 4; AP: -3.2mm; ML: 1.9mm; DV: -3.5mm), or left auditory  
324 cortex respectively (n = 5; 1.75mm anterior to the lambda structure on the ridge line). All  
325 injections were done using a Hamilton needle (Hamilton Company, 34 gauge, 1 inch, 12  
326 degree bevel) and syringes (Hamilton Company, 1700 series, 5 $\mu$ L capacity), and a  
327 microinjection pump (Harvard Apparatus) at a flow rate of 0.60-0.75 $\mu$ L/min. For injections  
328 in the basal forebrain, the injection needle was left in place for at least 5 minutes following  
329 infusion to reduce backflow. Finally, a custom-made stainless steel headpost was affixed  
330 to the exposed skull with C&B Metabond dental cement (Parkell) and animals were  
331 allowed to recover for at least 3 weeks before imaging.

332

### 333 **Data acquisition using two-photon microscopy**

334 Imaging was performed using a two-photon resonant-scanning microscope  
335 (Neurolabware) equipped with a 16X objective (Nikon). To image in the auditory cortex,  
336 the objective was tilted to an angle of 50-60° such that it is perpendicular to the brain  
337 surface. Two-photon fluorescence of axon-GCaMP6s and jRGECO1a was excited at 980  
338 nm using an Insight X3 laser (SpectraPhysics). We also used an electronically tunable  
339 lens to record near-simultaneously in L1 (60-100 $\mu$ m below dura) and L2/3 (150-200 $\mu$ m  
340 below dura) in sites that contained axonal segments (312 $\mu$ m x 192 $\mu$ m area, frame rate  
341 31.92Hz overall, 15.96 per plane, laser power  $\leq$  40mW). As we did not observe significant  
342 differences in sound-evoked axonal response between the two layers, data across the  
343 two layers were grouped together for analysis.

344 To record time courses of sound-evoked axonal activity, awake animals were head-fixed  
345 under the microscope and a speaker was placed adjacent to the animal (microphone-to-  
346 ear distance  $\sim$ 5cm). Animals were presented with a set of 11 auditory stimuli consisting  
347 of 8 pure tones (70 dB, 4.8–54.8 kHz, half-octave intervals, 100ms, 10ms cosine on/off  
348 ramps) and 3 complex sounds (70-80 dB, white noise, frequency-modulated up-, and  
349 down-sweep, 100ms). Auditory stimuli in the set were presented in a pseudo-random  
350 order with 3.3s interval between sounds and the stimuli set was repeated 20 times during  
351 each imaging session. Scanner noise was attenuated to 40-50 dB using a custom-made  
352 foam sound enclosure directly surrounding the animal. Images were collected at 2x and  
353 4x magnification using ScanBox software (Neurolabware) and motion-corrected with  
354 Suite2p<sup>50</sup>. A widefield vasculature image was also be taken at each imaging site to help  
355 with multiple site alignment.

356

### 357 **Data analysis**

358 Data analysis was performed using custom functions written in MATLAB (MathWorks).  
359 To obtain time-courses of axonal and neuronal activity, we manually identified regions-  
360 of-interest (ROIs) with ImageJ (NIH) for axons and cells from mean fluorescence images

361 at each field-of-view and extracted the timeseries of their fluorescence activity. For each  
362 presentation of auditory stimuli, we calculated  $\Delta F/F$  of the sound-evoked response as the  
363 ratio of mean fluorescence in duration-matched response windows before and after tone  
364 presentation. ROIs were determined to be responsive to a particular stimulus if their  
365 evoked responses showed a significant difference across 20 presentations of the same  
366 stimuli ( $p < 0.025$ , right-tailed paired t-test).

367 To align multiple sites in each animal, pixel-wise x- and y-offset between each imaging  
368 site were measured by manually comparing vasculature images using Photoshop v14.0  
369 (Adobe). These offset values were used in a custom MATLAB function to stitch the  
370 vasculature and two-photon images together. For analysis of axonal tonotopy in the  
371 primary auditory cortex, the primary auditory cortex was first located by analyzing cortical  
372 neuronal (jRGECO1a) response for imaging sites with tone-responsive neurons. The  
373 relative positions of axon segments in the primary auditory cortex along the rostro-caudal  
374 axis were obtained from the stitched image and plotted against their most responsive  
375 frequency. Tonotopy is operationalized as the change in best frequency of cholinergic  
376 axon segments along the rostro-caudal axis. To compare tonotopy between cholinergic  
377 axons and cortical neurons, size-matched area of primary auditory cortex were identified  
378 in animals expressing the same family of calcium indicator (GCaMP6f) in excitatory  
379 cortical neurons. These animals underwent the same surgical process described above  
380 but received viral injection of GCaMP6f (1 $\mu$ L, AAV9-CamKII-GCaMP6f, addgene) in the  
381 same coordinates in the auditory cortex and did not receive axon-GCaMP6s injection in  
382 the basal forebrain. The primary auditory cortex was located in these animals by  
383 identifying the region with an increasing change in best frequency along the rostro-caudal  
384 axis as described in previous studies<sup>22</sup>. Tonotopy of cortical neurons were quantified as  
385 described above.

386 For comparison of cortical neuron and axonal tuning, distance of each ROI was calculated  
387 as the Euclidian distance between the center of the ROIs. ROIs within 20 $\mu$ m were  
388 considered as 'nearby'. As we were unable to accurately determine the z-offset between  
389 each imaging site, cortical neurons and nearby axonal segments and neurons used were  
390 limited to within each imaging site. To improve signal-to-noise ratio for analysis comparing  
391 tuning of cortical neurons and nearby cortical neurons, analysis was restricted to cell ROIs  
392 with evoked response greater than the noise ceiling (97.5<sup>th</sup> percentile of all fluorescence  
393 activity).

394 For tonic activity correlation analysis, a lowpass filter (passband frequency = 0.5Hz) was  
395 applied to the raw fluorescence trace and the movement signal. Correlation coefficient is  
396 calculated for the relevant filtered timeseries using the entire session. Movement was  
397 calculated using the x-y offset of the motion-corrected image. x-y offset was extracted  
398 using Suite2p and the amplitude of movement signal was calculated as the absolute  
399 difference of the Euclidean norm of x- and y-offset for each successive frame. To quantify  
400 tonic fluctuations that were closely coupled with movement, changes in tonic activity and  
401 movement were digitized using respective thresholds. The tonic threshold was defined as

402 two median absolute deviations above median tonic activity of each recording session;  
403 the movement threshold was defined as x-y offset greater than 1 pixel. Tonic epochs were  
404 labeled as closely coupled with movement if onset of movement occur within 0.2s of  
405 change in tonic activity. Processed data were visually inspected to validate the  
406 appropriateness of the chosen thresholds. To compare tonic cholinergic activity across  
407 imaging sessions and animals, fluorescence of each session was standardized by  
408 subtracting the median and dividing this difference by the median absolute deviation. This  
409 method of standardization was adopted as we observed a wide dynamic range of baseline  
410 tonic activity that could not be digitally classified into 'low' and 'high'. On this interval scale,  
411 median level of tonic activity is designated '0', whereas low tonic epochs are negative and  
412 high tonic epochs are positive. This allowed us to compare tonic cholinergic activity  
413 without setting an arbitrary 'tonic floor'.

414 For multi-class decoding, we used a naïve Bayes classifier to classify calcium activity into  
415 multiple stimuli classes. We trained the frame-by-frame decoder using frame-by-frame  
416 raw fluorescence values of all axon ROIs for 19 presentations of the three complex  
417 auditory stimuli or eight pure tone and tested the decoder on a left-out trial. We validated  
418 stimulus-decoding accuracy with a twenty-fold cross-validation. Shuffled data was  
419 constructed from the same axonal activity but the label for tone identity was randomized.  
420 95% confidence interval for shuffled data was calculated by iterating the classification of  
421 shuffled data for 100 times and taking the value of the 2.5<sup>th</sup> and 97.5<sup>th</sup> percentile. To  
422 investigate if performance of the linear decoder was driven by high decoding accuracy of  
423 specific tones, we conducted pairwise decoding using the same naïve Bayes classifier  
424 applied to every pair of auditory stimuli (complex sounds or pure tones). We trained the  
425 decoder with mean raw fluorescence values of the frames with maximum decoding as  
426 determined by the previous analysis (3-7 frames after tone presentation) of all axon  
427 segments. To test the robustness of our decoding, we trained our decoders with  
428 population activity from all axon ROIs and tested their decoding accuracy while removing  
429 the top n<sup>th</sup> percentile of most influential ROIs (based on the size of the weights). We  
430 further examined decoding accuracy per animal by training the frame-by-frame and  
431 pairwise decoder on responsive axon ROI activity in 6 animals with more than 100  
432 responsive axon segments.

433

### 434 **Chemogenetic suppression**

435 Mice expressing inhibitory DREADDs hM4Di first received 10mL/kg intraperitoneal  
436 injections of saline. 15min after saline injection, the animals were placed under the two-  
437 photon microscope and activity of cholinergic axonal projections to the auditory cortex  
438 was recorded in a similar protocol described above. At the end of the imaging session,  
439 animals were removed from head-fixation for 5min before receiving intraperitoneal  
440 injection of 0.5-3mg/kg clozapine N-oxide (CNO). Volume of saline and CNO injections  
441 were matched. 15min after CNO injection, the animals were placed back under the two-  
442 photon microscope and activity of cholinergic axonal projections to the auditory cortex

443 was again recorded. Efforts were made to image the same axons for saline and CNO  
444 injections. At the end of the experiment, a subset of mice was perfused for histology to  
445 determine the expression of hM4Di. Recording sessions for saline and CNO injections  
446 were aligned and preprocessed separately and the responses of cholinergic axon  
447 segments were quantified as described above. Main effect of CNO injection was  
448 quantified using 2-way ANOVA (Type II SS). Analyses comparing mean evoked response  
449 after saline and CNO injection were limited to 9.5-19kHz as these tones elicited evoked  
450 responses in the cholinergic axons in the imaging sites following saline injection.

451 To verify that CNO injection suppressed the medial geniculate body and auditory cortex  
452 in mice expressing hM4Di in the respective areas, control experiments were conducted.  
453 ChAT-cre mice received GCaMP6f injection in the auditory cortex (1 $\mu$ L, AAV9-CamKII-  
454 GCaMP6f, addgene) and hM4Di injection in either the medial geniculate body or auditory  
455 cortex as described above. 3 weeks after injections, chemogenetic suppression protocol  
456 described above were conducted and cortical response to auditory stimuli were recorded  
457 following intraperitoneal saline and CNO injection. Preprocessing and quantification of  
458 cortical responses were performed as described above. Analyses comparing mean  
459 evoked response after saline and CNO injection were limited to 9.5-19kHz for medial  
460 geniculate body suppression condition and 4.8-19kHz auditory cortex suppression  
461 condition as these tones elicited evoked responses in the cortical neurons in the imaging  
462 sites following saline injection.

463

## 464 **Histology**

465 To confirm the specific expression of axon-GCaMP6s in basal forebrain cholinergic  
466 neurons following injection in ChAT-cre mice, we performed immunohistochemistry with  
467 ChAT and GFP antibodies. We also performed histological analysis (without antibodies)  
468 to confirm the expression of inhibitory DREADDs hM4Di (which expresses a mCherry  
469 fluorescence marker) in neurons in the medial geniculate body and auditory cortex  
470 respectively.

471 Mice were deeply anesthetized and transcardially perfused with ~20mL phosphate-  
472 buffered saline (PBS) solution followed by ~20mL 4% PFA. Brains were then extracted  
473 from the skull and post-fixed in 4% PFA overnight at 4°C before transfer to 30% sucrose  
474 solution for 2-3 days at 4°C. Next, the brains were frozen in tissue tek O.C.T. compound  
475 (Sakura Finetek) at 80°C for multiple days to prepare for slicing. Frozen brains were sliced  
476 coronally with 35 $\mu$ m thickness on a cryostat and permeabilized for 15min with 0.3% PBS-  
477 Triton (PBS solution with 0.3% Triton X-100 (Sigma Aldrich)). Slices were incubated for  
478 1hr in a blocking buffer containing 0.3% PBS-Triton and 10% Normal Donkey Serum  
479 (Synaptic Systems). Slices were then transferred to fresh 0.3% PBS-Triton and incubated  
480 overnight at 4°C with appropriate primary antibodies (1:200-500 dilution of goat anti-ChAT  
481 IgG, Millipore, AB114P; 1:500 rabbit anti-GFP IgG, Abcam, ab6556 or 1:300 rabbit anti-  
482 GFP IgG, ThermoFisher, A-6455 (both anti-GFP had similar level of expression)).

483 Afterwards, slices were washed in PBS solution and incubated for 1hr at room  
484 temperature with secondary antibody (1:500 Cy™3 AffiniPure Donkey Anti-Goat IgG,  
485 Jackson ImmunoResearch, 705-165-147; 1:500 Alexa Fluor® 488 AffiniPure Donkey  
486 Anti-Rabbit IgG, Jackson ImmunoResearch, 711-545-152). Finally, slices were rinsed in  
487 PBS solution and incubated at room temperature in DAPI Fluoromount-G (Southern  
488 Biotech) before being mounted onto glass slides and coverslipped for imaging.

489 Images for cell counting were acquired using a 20x air objective on a Zeiss LSM 700  
490 Confocal Microscope (Carl Zeiss) from the basal forebrain for axon-GCaMP6s  
491 immunohistochemistry. Cell counts were performed manually in ImageJ (NIH). Coronal  
492 slice images were acquired using a 10x air objective on a Zeiss LSM 700 Confocal  
493 Microscope (Carl Zeiss). The basal forebrain, medial geniculate nucleus and auditory  
494 cortex were located using coordinates from the Allen Brain Atlas and references from  
495 other studies<sup>41,42</sup>.

496

### 497 **Statistical Analysis**

498 All statistical analyses were performed in MATLAB (MathWorks). All data are reported as  
499 mean ± SEM unless otherwise indicated. Statistical significance was defined as  $p < 0.05$   
500 unless otherwise indicated.

501

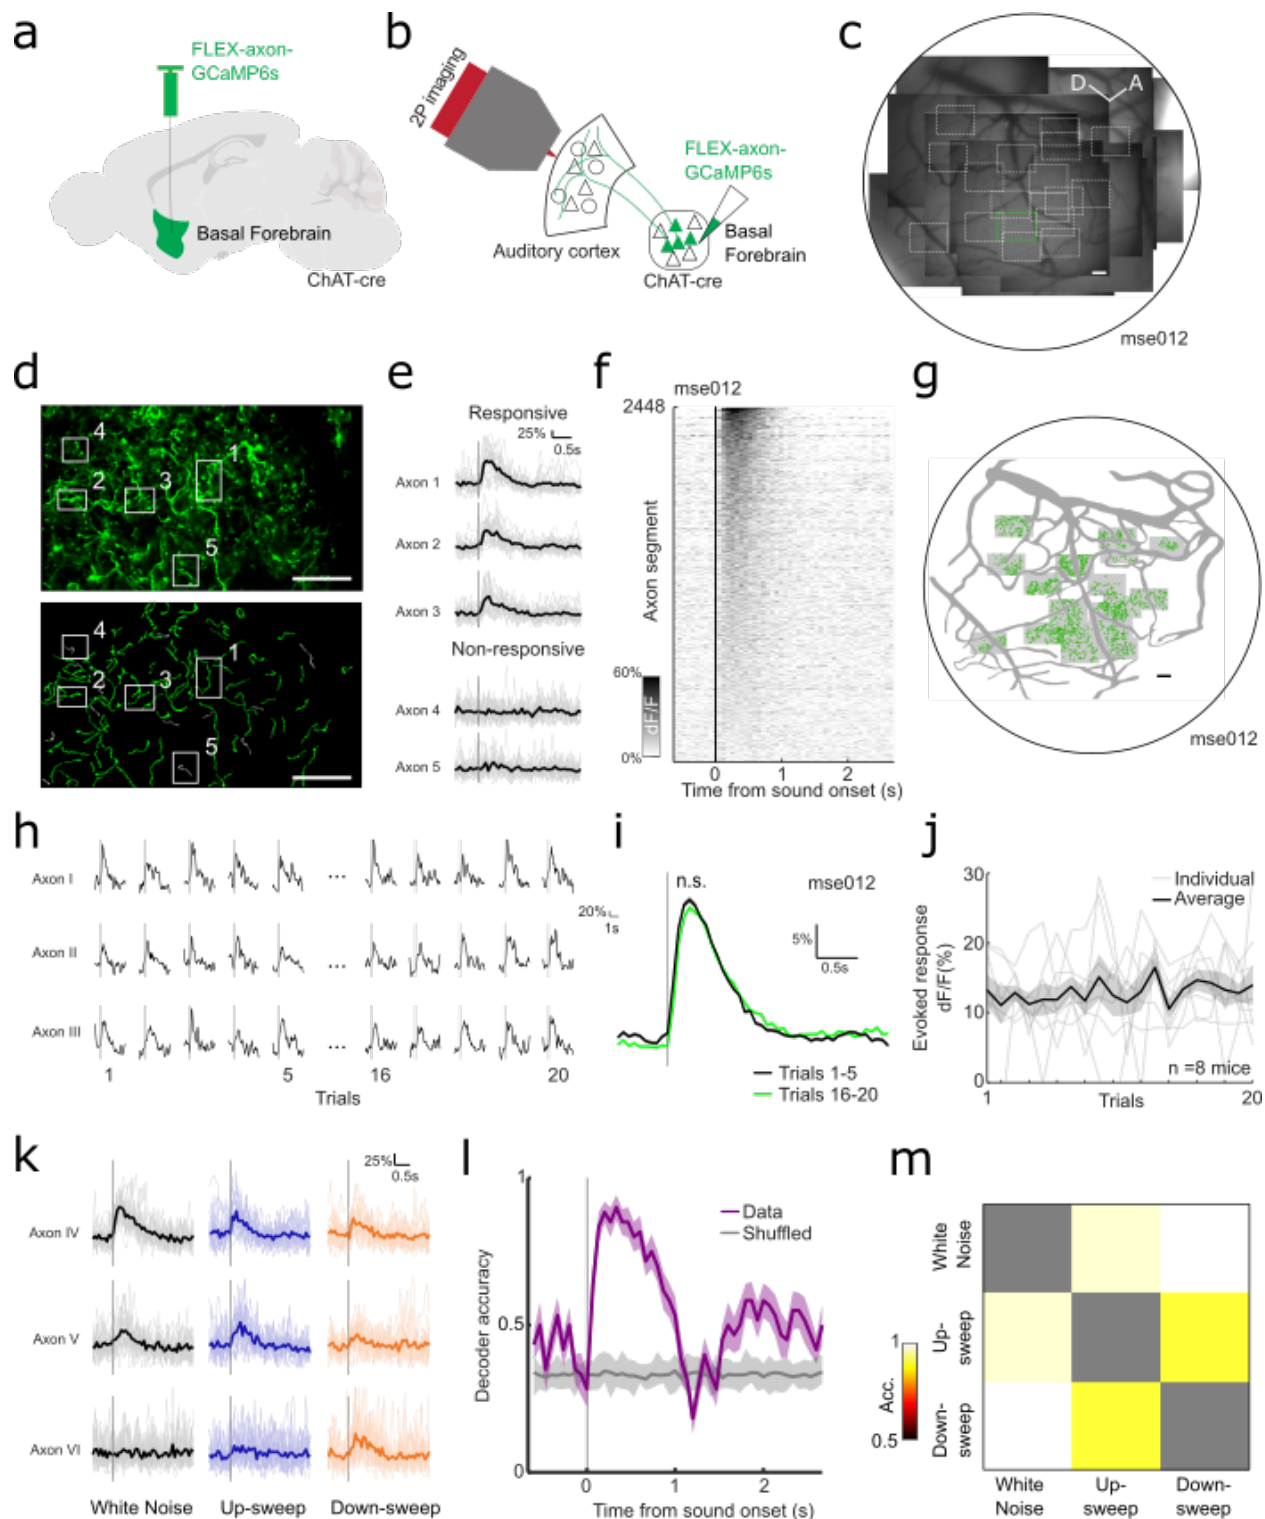

502

503 **Figure 1** Robust, non-habituating, and stimulus-specific auditory response of cholinergic  
 504 axons. (a) Schematic of basal forebrain viral injection. (b) Schematic of CBF projection to  
 505 auditory cortex and imaging above auditory cortex. (c) Composite widefield image of all  
 506 recording sites in one example animal. Black border demarcates approximate location of  
 507 cranial window and white boxes indicate two-photon imaging sites at 4x magnification.

508 Green box indicates location of example site in **(d)**. Scalebar = 100 $\mu$ m **(d)** Top: Mean  
509 fluorescence image of cholinergic axons (green, axon-GCaMP6s) in example recording  
510 site. Bottom: manually identified axon ROIs of example site. Responsivity of example  
511 axon ROIs in boxes 1-5 are shown in **(e)**. Scalebar = 50 $\mu$ m **(e)** Example traces of axon  
512 ROIs that are responsive and non-responsive to white noise presentation. Bold line  
513 indicates mean response across 20 presentations, faded traces indicate individual  
514 presentations of white noise. Gray lines indicate presentation of white noise. **(f)** Heatmap  
515 of average evoked response ( $\Delta F/F$ ) to white noise for all identified axon segments in one  
516 animal ( $n = 2448$  axon segments). **(g)** Spatial distribution of axon segments responsive  
517 to white noise (green) in one animal. Shaded boxes indicate recording sites. Scalebar =  
518 100 $\mu$ m **(h)** Fluorescence trace of example axon ROIs for 1-5 and 16-20 presentation of  
519 white-noise stimulus. Gray lines indicate presentation of white noise. **(i)** Mean  
520 fluorescence trace of all axon ROIs in one example animal for 1-5 (black) and 16-20  
521 (green) presentation of white noise stimulus,  $p = 0.412$ . Gray line indicates presentation  
522 of white noise and shaded region indicates SEM. **(j)** Amplitude of evoked response for  
523 white noise across 20 presentations for all animals ( $n = 8$  animals). **(k)** Example traces of  
524 axon ROIs that are responsive to white noise, up-sweeps and down-sweeps. Bold line  
525 indicates mean response across 20 presentations, faded traces indicate individual  
526 presentations of white noise. Gray lines indicate presentation of auditory stimulus. **(l)**  
527 Decoding accuracy of multi-class decoder predicting the identity of auditory stimuli from  
528 population axonal activity (white noise, up- and down-sweeps). **(m)** Pairwise population  
529 decoding of white noise, up-sweep and down-sweep.

530

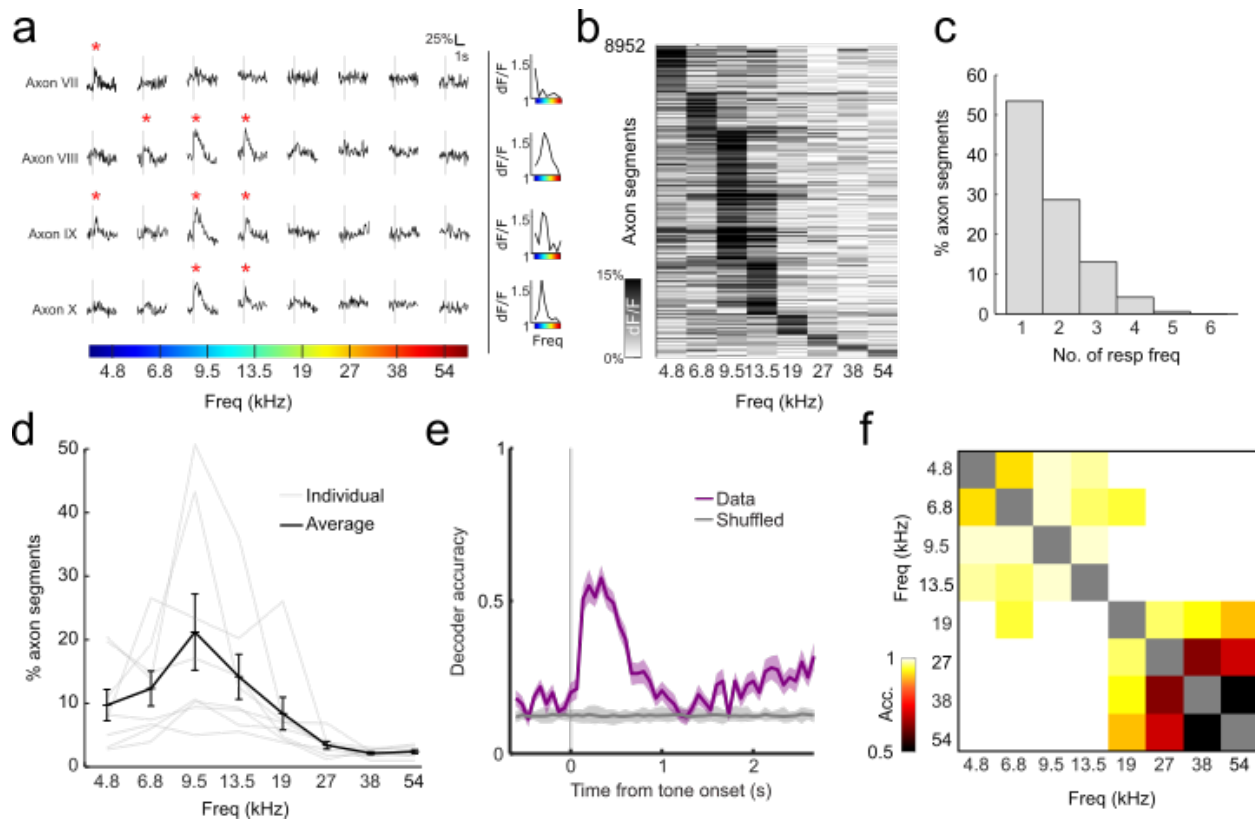

531

532 **Figure 2** Frequency-specific tuning of cholinergic axons. (a) Selective evoked responses  
533 to pure tones in 4 example axon segments. Gray lines indicate presentation of auditory  
534 stimulus and red asterisks indicate significant responses. Tuning curve for each axon is  
535 plotted on the right. (b) Heatmap of amplitude of evoked response to pure tones in  
536 responsive axons. (c) Proportion of responsive axon segments that respond to various  
537 numbers of pure tones (d) Proportion of sound-responsive axon segments that responded  
538 to each pure tone for all animals (n = 8 animals). (e) Decoding accuracy of multi-class  
539 decoder predicting the identity of pure tone presented from population axonal activity. (f)  
540 Pairwise population decoding of 8 pure tones presented.

541



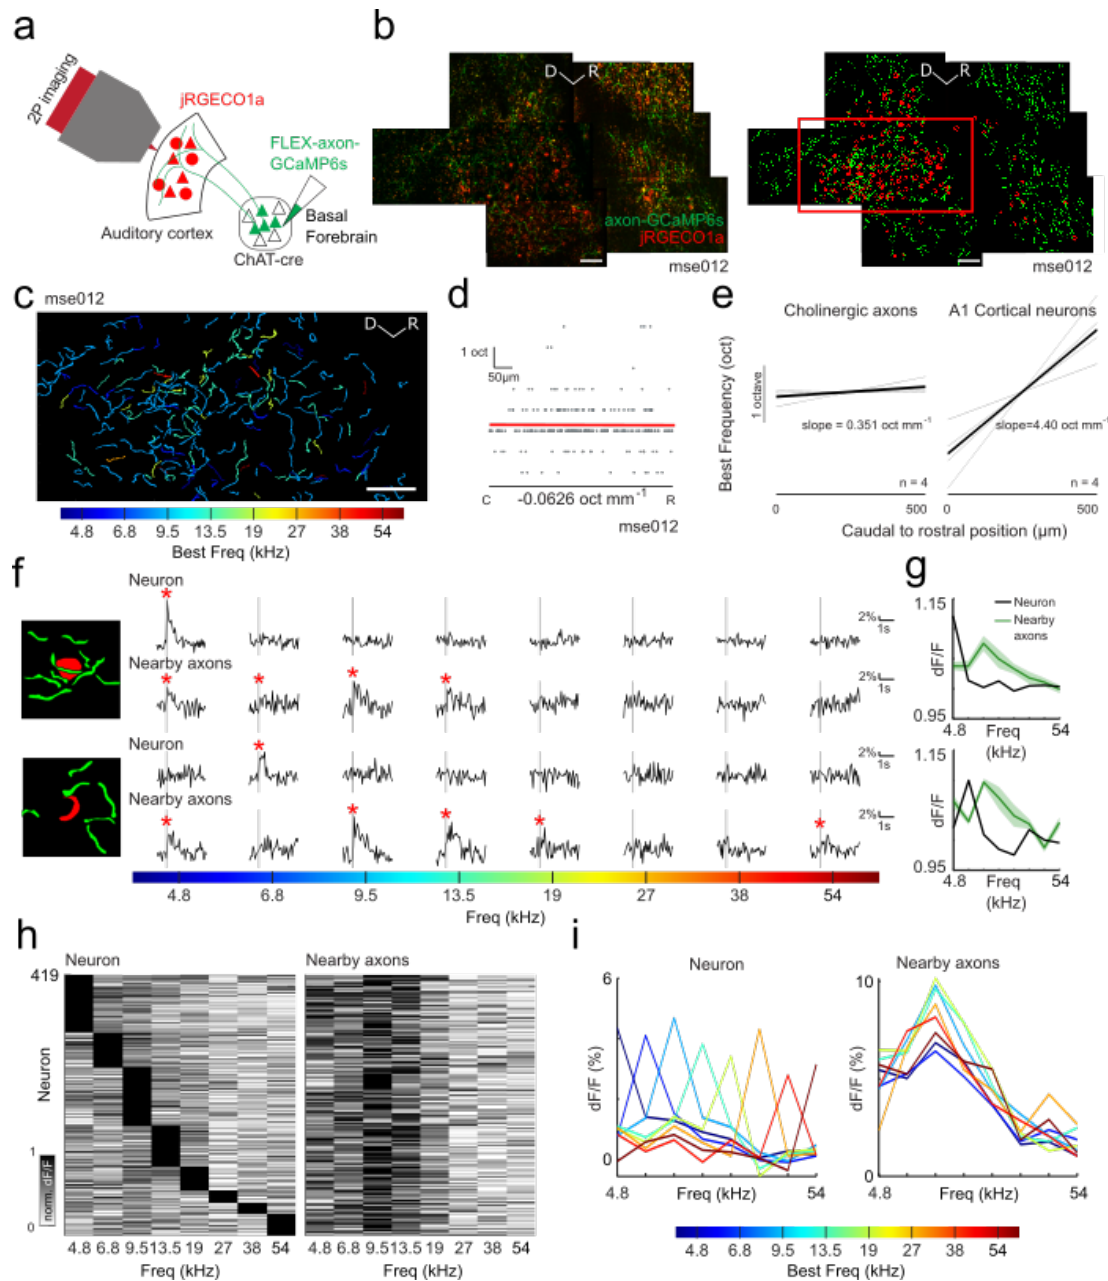

542

543 **Figure 3** Frequency tuning of cholinergic axons uncoupled from tuning of cortical neurons.

544 **(a)** Schematic of CBF projection to auditory cortex showing imaging strategy. **(b)** Left:

545 mean composite fluorescence image of cholinergic axons (green) and cortical neurons

546 (red) in example animal. Right: manually identified axon (green) and neuron (red) ROIs.

547 Only responsive ROIs are shown. Red box indicates location of field of view in **(c)**.

548 Scalebar = 50µm **(c)** Axon ROIs colored by their best frequencies. Scalebar = 50µm **(d)**

549 Change in best frequency of axon ROIs in **(c)** along the caudal-rostral axis. Scalebar =

550 50µm **(e)** Comparison of average change in best frequency for axon ROIs (n = 4 sites)

551 and neuron ROIs in primary auditory cortex (n = 4 sites). **(f)** Left: schematic of example

552 neurons and nearby axon segments (within 20µm). Right: mean evoked response of

553 neuron and nearby axon segments to pure tone stimuli. Gray lines indicate presentation  
554 of auditory stimulus **(g)** Frequency tuning curve of example neurons (black) and nearby  
555 axon segments (green) in **(f)**. **(h)** Left: normalized evoked response to pure tones of  
556 cortical neurons (n = 419 neurons). Right: normalized mean evoked response to pure  
557 tones of the nearby axon segments of the neuron in the corresponding row of the left  
558 heatmap. **(i)** Left: mean tuning curve of cortical neurons grouped by their best frequency.  
559 Right: mean tuning curve of the nearby axon segments of cortical neurons grouped by  
560 best frequency of cortical neurons.

561

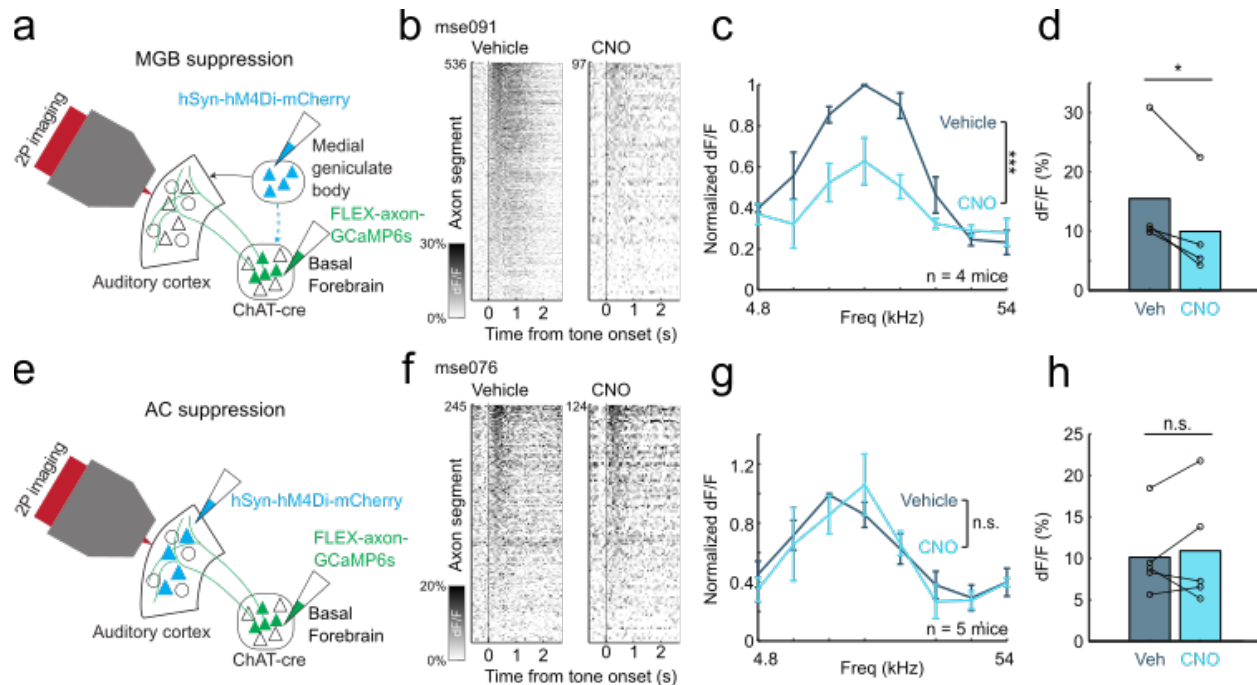

562

563 **Figure 4** Suppression of auditory thalamus but not auditory cortex attenuates sound-  
 564 evoked cholinergic responses. **(a)** Schematic of injection strategy for suppression of the  
 565 medial geniculate body. **(b)** Evoked response in cholinergic axon segments to most  
 566 responsive frequencies (9.5-19kHz) after intraperitoneal saline (left) and CNO injection  
 567 (right) for an example animal. **(c)** Normalized evoked response to pure tones after  
 568 intraperitoneal saline and CNO injection (n = 4 animals). Evoked response is significantly  
 569 attenuated after CNO injection  $F(1,48) = 27.67$ ,  $p < 0.001$ . **(d)** Mean evoked response to  
 570 most responsive frequencies ( $p < 0.05$ ; n = 4 animals). **(e)** Schematic of injection strategy  
 571 for suppression of the auditory cortex. **(f)** Evoked response in cholinergic axon segments  
 572 to most responsive frequencies (9.5-19kHz) after intraperitoneal saline (left) and CNO  
 573 injection (right) for an example animal. **(g)** Normalized evoked response to pure tones  
 574 after intraperitoneal saline and CNO injection (n = 5 animals). Evoked response is not  
 575 attenuated after CNO injection,  $F(1,64) = 0.01$ ,  $p = 0.908$ . **(h)** Mean evoked response to  
 576 most responsive frequencies ( $p = 0.76$ ; n = 5 animals).

577

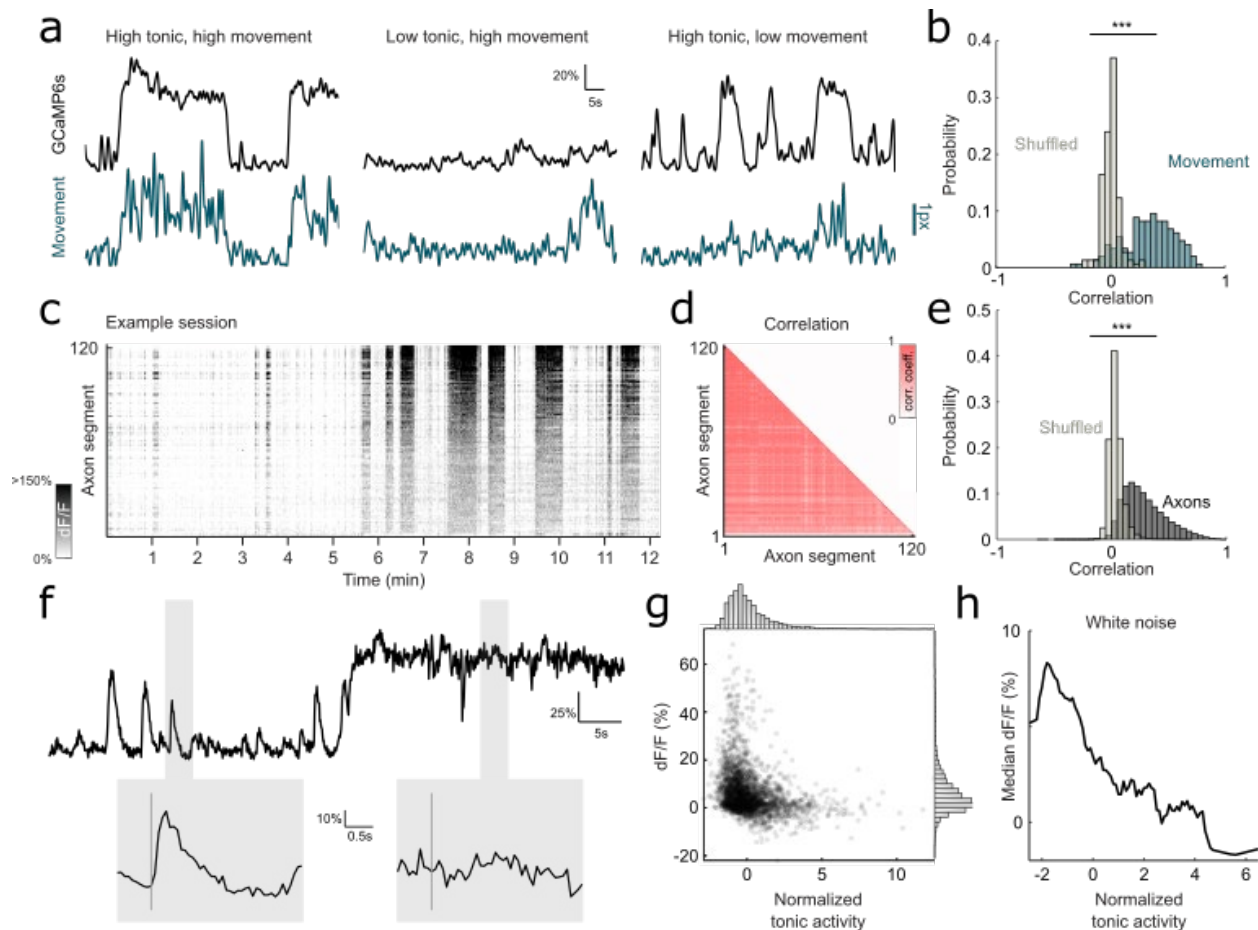

578

579 **Figure 5** State-dependent tonic cholinergic activity modulates sound-evoked cholinergic  
580 responses. (a) Example tonic GCaMP6s fluorescence (black) and movement (turquoise).  
581 Some high tonic epochs are associated with movement (left), some movement are not  
582 associated with high tonic epoch (center), and some high tonic epochs are not associated  
583 with movement (right). Scalebar indicates 1-pixel movement. (b) Histogram of correlation  
584 coefficient of GCaMP6s signal and movement (turquoise) compared to shuffled data  
585 (gray),  $p < 0.001$ . (c) Tonic GCaMP6s signal for all axon ROIs in example recording site.  
586 (d) Correlation matrix of tonic activity for all ROIs in (c). (e) Histogram of correlation  
587 coefficient of axon ROIs in each recording site (black) compared to shuffled data (gray),  
588  $p < 0.001$ . (f) Top: example mean fluorescence activity of one recording session showing  
589 low and high tonic activity. Shaded regions indicate response windows to white noise  
590 stimulus. Bottom: evoked response to white noise at low and high tonic activity  
591 corresponding to windows highlighted above. Gray line indicates presentation of white  
592 noise. (g) Scatterplot of mean evoked response to white noise at different tonic  
593 cholinergic baseline. Histogram for normalized tonic activity (top) and evoked response  
594 (right). (h) Median evoked response to white noise across entire dynamic range of tonic  
595 activity.

596

597

## References

- 598 1. Mesulam, M. M., Mufson, E. J., Wainer, B. H. & Levey, A. I. Central cholinergic  
599 pathways in the rat: An overview based on an alternative nomenclature (Ch1-  
600 Ch6). *Neuroscience* **10**, 1185–1201 (1983).
- 601 2. Everitt, B. J. & Robbins, T. W. Central Cholinergic Systems and Cognition. *Annu.*  
602 *Rev. Psychol.* **48**, 649–684 (1997).
- 603 3. Zaborszky, L., Gaykema, R. P., Swanson, D. J. & Cullinan, W. E. Cortical input to  
604 the basal forebrain. *Neuroscience* (1997).
- 605 4. Gielow, M. R. & Zaborszky, L. The Input-Output Relationship of the Cholinergic  
606 Basal Forebrain. *Cell Rep.* (2017).
- 607 5. Chavez, C. & Zaborszky, L. Basal Forebrain Cholinergic-Auditory Cortical  
608 Network: Primary Versus Nonprimary Auditory Cortical Areas. *Cereb. Cortex* **27**,  
609 2335–2347 (2017).
- 610 6. Parikh, V., Kozak, R., Martinez, V. & Sarter, M. Prefrontal Acetylcholine Release  
611 Controls Cue Detection on Multiple Timescales. *Neuron* **56**, 141–154 (2007).
- 612 7. Lin, S. C. & Nicolelis, M. A. L. Neuronal Ensemble Bursting in the Basal Forebrain  
613 Encodes Salience Irrespective of Valence. *Neuron* **59**, 138–149 (2008).
- 614 8. Higley, M. J. & Picciotto, M. R. Neuromodulation by acetylcholine: Examples from  
615 schizophrenia and depression. *Curr. Opin. Neurobiol.* **29**, 88–95 (2014).
- 616 9. Gritton, H. J. *et al.* Cortical cholinergic signaling controls the detection of cues.  
617 *Proc. Natl. Acad. Sci. U. S. A.* **113**, E1089–E1097 (2016).
- 618 10. Sarter, M. & Lustig, C. Cholinergic double duty: cue detection and attentional  
619 control. *Curr. Opin. Psychol.* **29**, 102–107 (2019).
- 620 11. Hasselmo, M. E. The role of acetylcholine in learning and memory. *Current*  
621 *Opinion in Neurobiology* (2006).
- 622 12. Newman, E. L., Gupta, K., Climer, J. R., Monaghan, C. K. & Hasselmo, M. E.  
623 Cholinergic modulation of cognitive processing: Insights drawn from  
624 computational models. *Front. Behav. Neurosci.* **6**, 1–19 (2012).
- 625 13. Letzkus, J. J. *et al.* A disinhibitory microcircuit for associative fear learning in the  
626 auditory cortex. *Nature* **480**, 331–335 (2011).
- 627 14. Ballinger, E. C., Ananth, M., Talmage, D. A. & Role, L. W. Basal Forebrain  
628 Cholinergic Circuits and Signaling in Cognition and Cognitive Decline. *Neuron* **91**,  
629 1199–1218 (2016).
- 630 15. Maurer, S. V. & Williams, C. L. The cholinergic system modulates memory and  
631 hippocampal plasticity via its interactions with non-neuronal cells. *Front. Immunol.*  
632 **8**, (2017).
- 633 16. Bakin, J. S. & Weinberger, N. M. Induction of a physiological memory in the

- 634 cerebral cortex by stimulation of the nucleus basalis. *Proc. Natl. Acad. Sci. U. S.*  
635 *A.* **93**, 11219–11224 (1996).
- 636 17. Kilgard, M. P. & Merzenich, M. M. Cortical map reorganization enabled by nucleus  
637 basalis activity. *Science*. **279**, 1714–1718 (1998).
- 638 18. Froemke, R. C., Merzenich, M. M. & Schreiner, C. E. A synaptic memory trace for  
639 cortical receptive field plasticity. *Nature* **450**, 425–429 (2007).
- 640 19. Froemke, R. C. *et al.* Long-term modification of cortical synapses improves  
641 sensory perception. *Nat. Neurosci.* **16**, 79–88 (2013).
- 642 20. Takesian, A. E., Bogart, L. J., Lichtman, J. W. & Hensch, T. K. Inhibitory circuit  
643 gating of auditory critical-period plasticity. *Nat. Neurosci.* **21**, 218–227 (2018).
- 644 21. Sarter, M., Lustig, C., Howe, W. M., Gritton, H. & Berry, A. S. Deterministic  
645 functions of cortical acetylcholine. *Eur. J. Neurosci.* **39**, 1912–1920 (2014).
- 646 22. Disney, A. A. & Higley, M. J. Diverse Spatiotemporal Scales of Cholinergic  
647 Signaling in the Neocortex. *J. Neurosci.* (2020).
- 648 23. Sarter, M. & Lustig, C. Forebrain Cholinergic Signaling: Wired and Phasic, Not  
649 Tonic, and Causing Behavior. *J. Neurosci.* **40**, 712–719 (2020).
- 650 24. Do, J. P. *et al.* Cell type-specific long-range connections of basal forebrain circuit.  
651 *Elife* **5**, 1–18 (2016).
- 652 25. Kim, J. H. *et al.* Selectivity of neuromodulatory projections from the basal  
653 forebrain and locus ceruleus to primary sensory cortices. *J. Neurosci.* **36**, 5314–  
654 5327 (2016).
- 655 26. Yang, C., Thankachan, S., McCarley, R. W. & Brown, R. E. The menagerie of the  
656 basal forebrain: how many (neural) species are there, what do they look like, how  
657 do they behave and who talks to whom? *Curr. Opin. Neurobiol.* **44**, 159–166  
658 (2017).
- 659 27. Laszlovszky, T. *et al.* Distinct synchronization, cortical coupling and behavioral  
660 function of two basal forebrain cholinergic neuron types. *Nat. Neurosci.* **23**, 992–  
661 1003 (2020).
- 662 28. Buzsaki, G. *et al.* Nucleus basalis and thalamic control of neocortical activity in  
663 the freely moving rat. *J. Neurosci.* (1988).
- 664 29. McGinley, M. J. *et al.* Waking State: Rapid Variations Modulate Neural and  
665 Behavioral Responses. *Neuron* **87**, 1143–1161 (2015).
- 666 30. Reimer, J. *et al.* Pupil fluctuations track rapid changes in adrenergic and  
667 cholinergic activity in cortex. *Nat. Commun.* **7**, 1–7 (2016).
- 668 31. Kuchibhotla, K. V. *et al.* Parallel processing by cortical inhibition enables context-  
669 dependent behavior. *Nat. Neurosci.* **20**, 62–71 (2017).
- 670 32. Teles-Grilo Ruivo, L. M. *et al.* Coordinated Acetylcholine Release in Prefrontal

- 671 Cortex and Hippocampus Is Associated with Arousal and Reward on Distinct  
672 Timescales. *Cell Rep.* **18**, 905–917 (2017).
- 673 33. Lohani, S. *et al.* Dual color mesoscopic imaging reveals spatiotemporally  
674 heterogeneous coordination of cholinergic and neocortical activity. *bioRxiv* (2021).
- 675 34. Hangya, B., Ranade, S. P., Lorenc, M. & Kepecs, A. Central Cholinergic Neurons  
676 Are Rapidly Recruited by Reinforcement Feedback. *Cell* **162**, 1155–1168 (2015).
- 677 35. Harrison, T. C., Pinto, L., Brock, J. R. & Dan, Y. Calcium imaging of basal  
678 forebrain activity during innate and learned behaviors. *Front. Neural Circuits* **10**,  
679 1–12 (2016).
- 680 36. Crouse, R. B. *et al.* Acetylcholine is released in the basolateral amygdala in  
681 response to predictors of reward and enhances the learning of cue-reward  
682 contingency. *Elife* **9**, 1–31 (2020).
- 683 37. Sturgill, J. F. *et al.* Basal forebrain-derived acetylcholine encodes valence-free  
684 reinforcement prediction error. *bioRxiv* (2020).
- 685 38. Pinto, L. *et al.* Fast modulation of visual perception by basal forebrain cholinergic  
686 neurons. *Nat. Neurosci.* (2013).
- 687 39. Eggermann, E., Kremer, Y., Crochet, S. & Petersen, C. C. H. Cholinergic Signals  
688 in Mouse Barrel Cortex during Active Whisker Sensing. *Cell Rep.* (2014).
- 689 40. Nelson, A. & Mooney, R. The Basal Forebrain and Motor Cortex Provide  
690 Convergent yet Distinct Movement-Related Inputs to the Auditory Cortex. *Neuron*  
691 **90**, 635–648 (2016).
- 692 41. Guo, W., Robert, B. & Polley, D. B. The Cholinergic Basal Forebrain Links  
693 Auditory Stimuli with Delayed Reinforcement to Support Learning. *Neuron* **103**,  
694 1164-1177.e6 (2019).
- 695 42. Robert, B. *et al.* A functional topography within the cholinergic basal forebrain for  
696 encoding sensory cues and behavioral reinforcement outcomes. *Elife* **10**, 1–28  
697 (2021).
- 698 43. Zhang, K., Chen, C. D. & Monosov, I. E. Novelty, Saliency, and Surprise Timing  
699 Are Signaled by Neurons in the Basal Forebrain. *Curr. Biol.* **29**, 134-142.e3  
700 (2019).
- 701 44. Stiebler, I., Neulist, R., Fichtel, I. & Ehret, G. The auditory cortex of the house  
702 mouse: Left-right differences, tonotopic organization and quantitative analysis of  
703 frequency representation. *J. Comp. Physiol. - A Sensory, Neural, Behav. Physiol.*  
704 **181**, 559–571 (1997).
- 705 45. Hackett, T. A., Barkat, T. R., O'Brien, B. M. J., Hensch, T. K. & Polley, D. B.  
706 Linking topography to tonotopy in the mouse auditory thalamocortical circuit. *J.*  
707 *Neurosci.* (2011).
- 708 46. Hu, R., Jin, S., He, X., Xu, F. & Hu, J. Whole-brain monosynaptic afferent inputs

- 709 to basal forebrain cholinergic system. *Front. Neuroanat.* **10**, 1–10 (2016).
- 710 47. Froemke, R. C. *et al.* Long-term modification of cortical synapses improves  
711 sensory perception. *Nat. Neurosci.* (2013).
- 712 48. Yerkes, R. M. & Dodson, J. D. The relation of strength of stimulus to rapidity of  
713 habit-formation. *J. Comp. Neurol. Psychol.* (1908).
- 714 49. Dana, H. *et al.* Sensitive red protein calcium indicators for imaging neural activity.  
715 *Elife* (2016).
- 716 50. Pachitariu, M. *et al.* Suite2p: beyond 10,000 neurons with standard two-photon  
717 microscopy. *bioRxiv* (2016).
- 718



719

## Supplementary Information

720

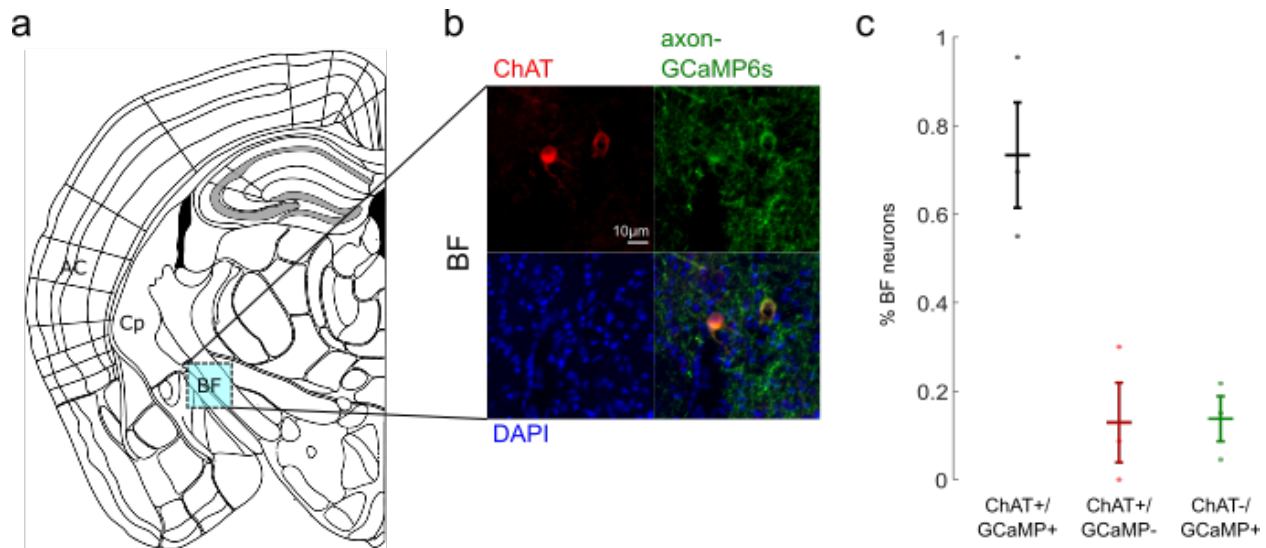

721

722 **Supplementary Fig. 1** Histology for cre-dependent cholinergic neurons targeting. (a)  
723 Schematic of imaging site for basal forebrain (BF). (b) Basal forebrain stained for  
724 inhibitory ChAT (red), axon-GCaMP6s (green), and DAPI. Histology is validated in 3  
725 animals. (c) Percentage of basal forebrain neurons that express both axon-GCaMP6s  
726 and ChAT (black), ChAT-only (red), or axon-GCaMP6s-only (green).

727

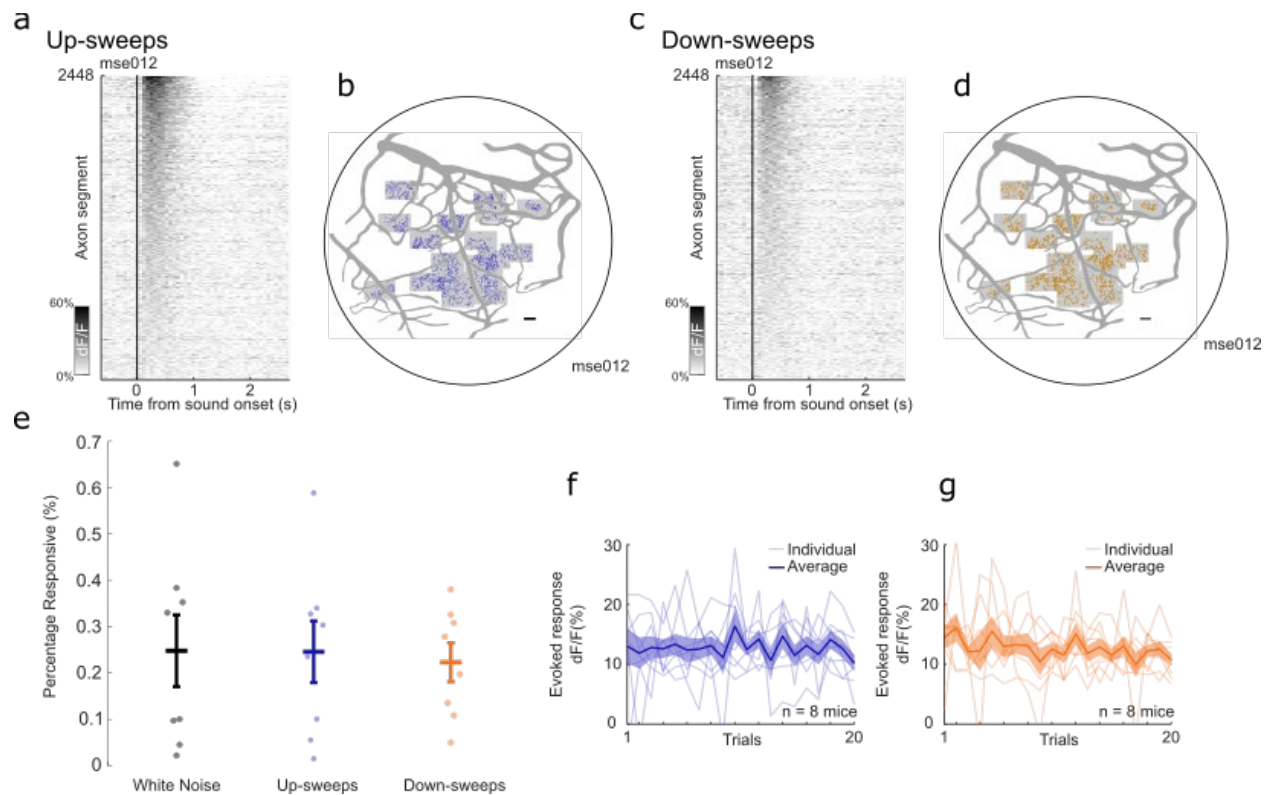

728

729 **Supplementary Fig. 2** Robust and non-habituating response to up-sweeps and down-  
730 sweeps. (a) Heatmap of average evoked response ( $\Delta F/F$ ) to up-sweeps for all identified  
731 axon segments in one animal ( $n = 2448$  axon segments). (b) Spatial distribution of axon  
732 segments responsive to up-sweeps (blue) in one animal. Shaded boxes indicate  
733 recording sites. Scalebar =  $100\mu\text{m}$  (c) Heatmap of average evoked response ( $\Delta F/F$ ) to  
734 down-sweeps for all identified axon segments in one animal ( $n = 2448$  axon segments).  
735 (d) Spatial distribution of axon segments responsive to down-sweeps (orange) in one  
736 animal. Shaded boxes indicate recording sites. Scalebar =  $100\mu\text{m}$  (e) Percentage of  
737 identified axon segments that are responsive to white noise (black), up-sweeps (blue),  
738 and down-sweeps (orange) in 8 animals (f) Amplitude of evoked response for up-  
739 sweeps across 20 presentations for all animals ( $n = 8$  animals). (g) Amplitude of evoked  
740 response for down-sweeps across 20 presentations for all animals ( $n = 8$  animals).

741

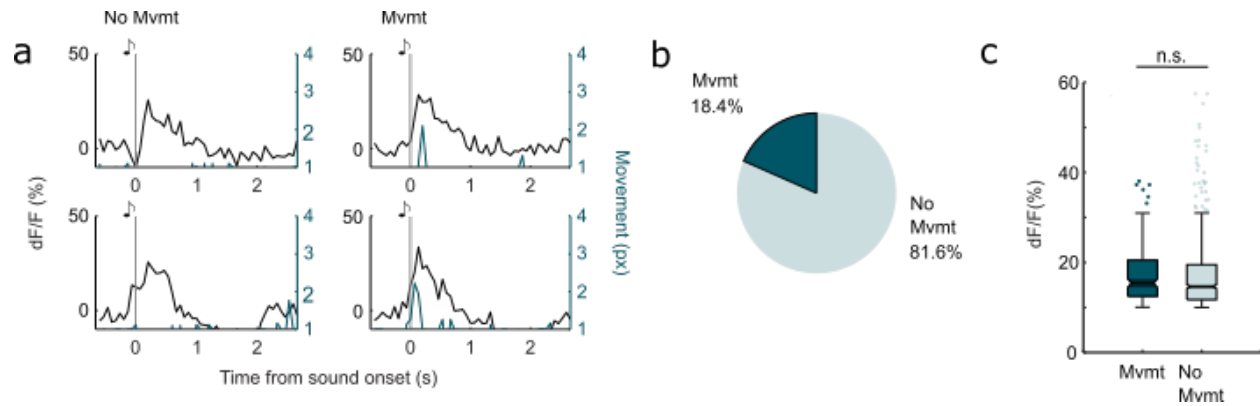

742

743 **Supplementary Fig. 3** Micromovements are associated with some but not all phasic  
744 cholinergic transients. (a) Example stimulus-synchronous phasic cholinergic transients  
745 from one example axon ROI that are associated with micromovement (left) and not  
746 associated with micromovement (right). (b) 18.4% of stimulus-synchronous phasic  
747 transients are associated with micromovements. (c) Micromovement does not  
748 significantly modulate amplitude of sound-evoked transients,  $p = 0.554$ .

749

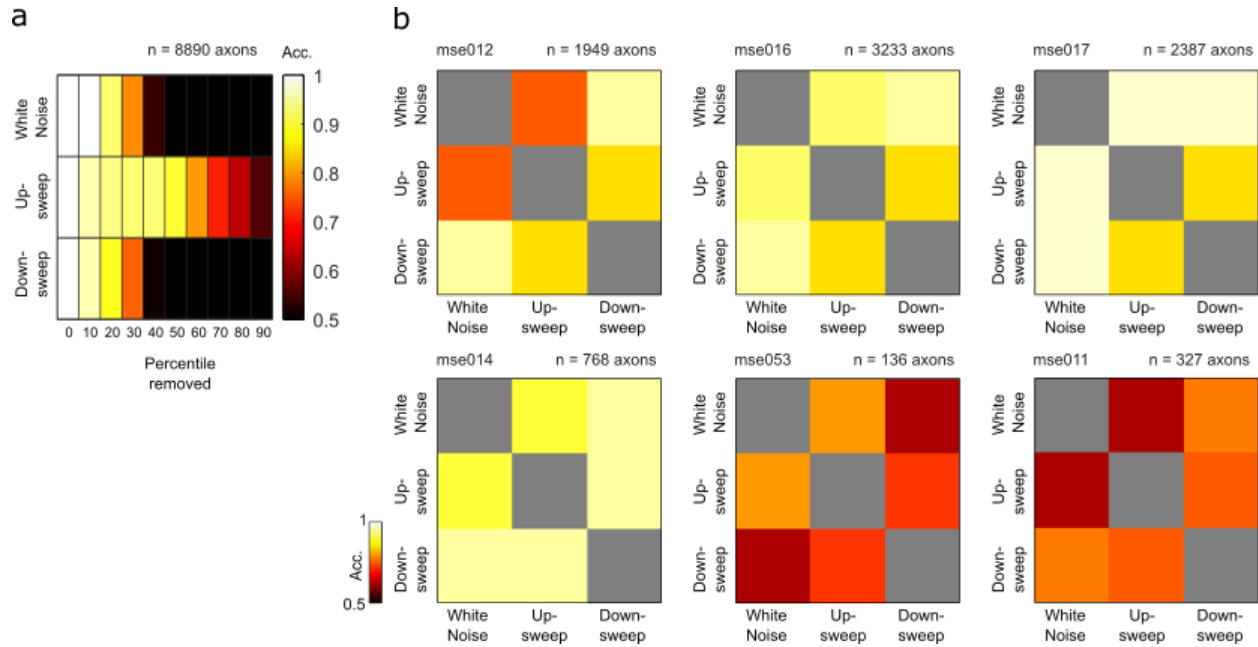

750

751 **Supplementary Fig. 4** Robust stimulus-specific decoding of complex sounds. **(a)**  
 752 Average pairwise decoding accuracy for each complex sound stimulus removing  $n^{\text{th}}$   
 753 percentile of most influential ROIs. **(b)** Pairwise decoder accuracy for complex sound  
 754 stimuli on population activity of responsive axon segments in animals with more than  
 755 100 responsive axon segments. All sound-pairs are significantly above chance.

756

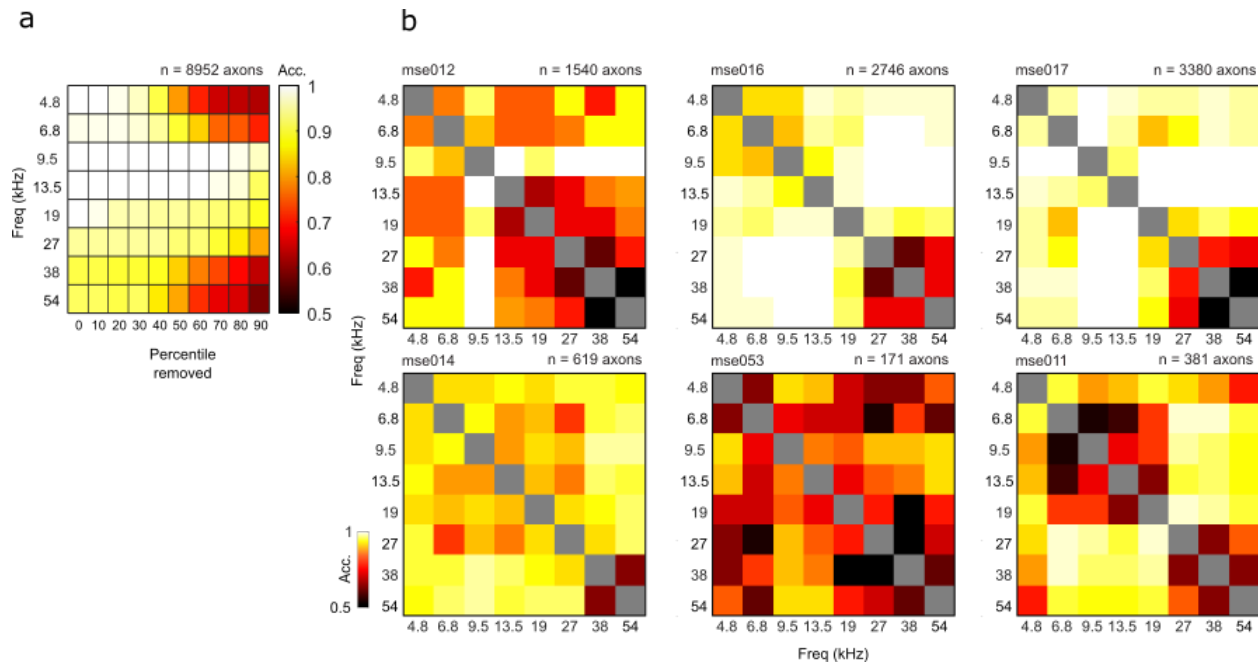

757

758 **Supplementary Fig. 5** Robust stimulus-specific decoding of pure tones. (a) Average  
759 pairwise decoding accuracy for each pure tone removing  $n^{\text{th}}$  percentile of most  
760 influential ROIs. (b) Pairwise decoder accuracy for pure tones on population activity of  
761 responsive axon segments in animals with more than 100 responsive axon segments.  
762  $97.6 \pm 0.1\%$  of sound-pairs are significantly above chance.

763

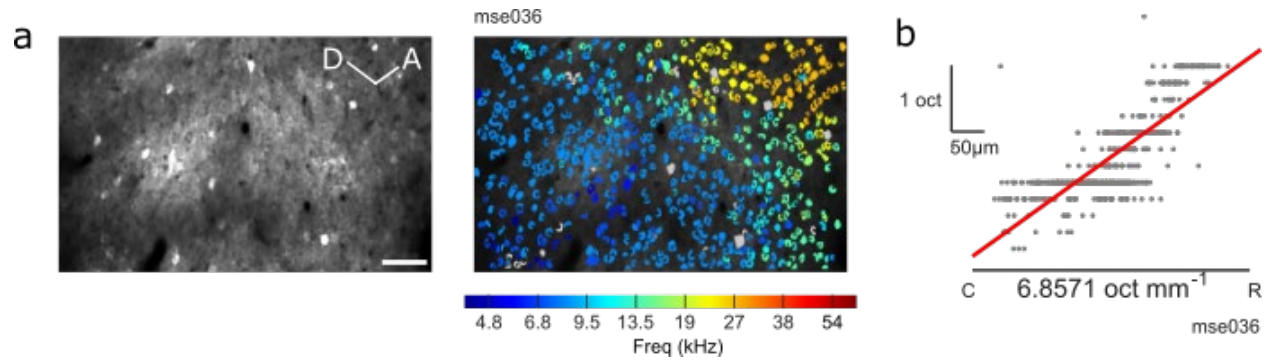

764

765 **Supplementary Fig. 6** Tonotopic gradient of excitatory neurons in primary auditory  
766 cortex. (a) Example field-of-view of cortical neurons in primary auditory cortex (left,  
767 CaMKII-GCaMP6f) and identified ROIs colored by best frequency of cortical neurons  
768 (right). Scalebar = 50µm (b) Change in best frequency of neuron ROIs in (a) along the  
769 caudal-rostral axis.

770

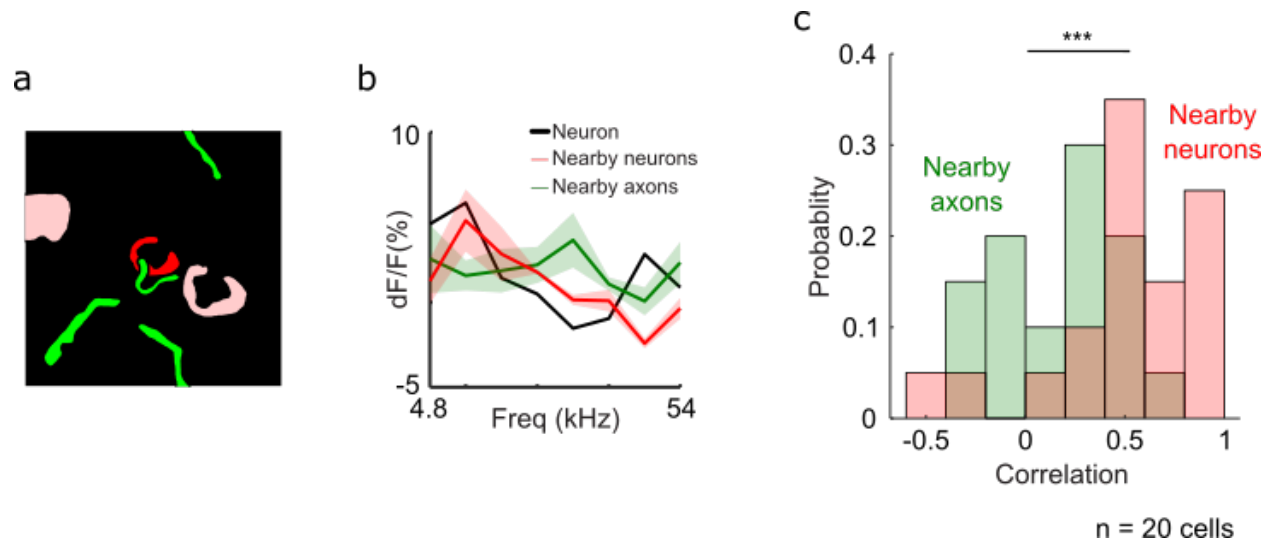

771

772 **Supplementary Fig. 7** Cortical neurons are co-tuned to nearby cortical neurons but un-  
773 coupled from nearby cholinergic axons. (a) Schematic of example neuron (red) and  
774 nearby neurons (pink) and responsive axon segments (green) (within 20µm). (b)  
775 Frequency tuning curve of example neuron (black) and nearby neurons (red) and axon  
776 segments (green) in (a). (c) Histogram of correlation coefficient between tuning of  
777 auditory cortical neurons with nearby cortical neurons (red) and nearby axon segments  
778 (green).

779



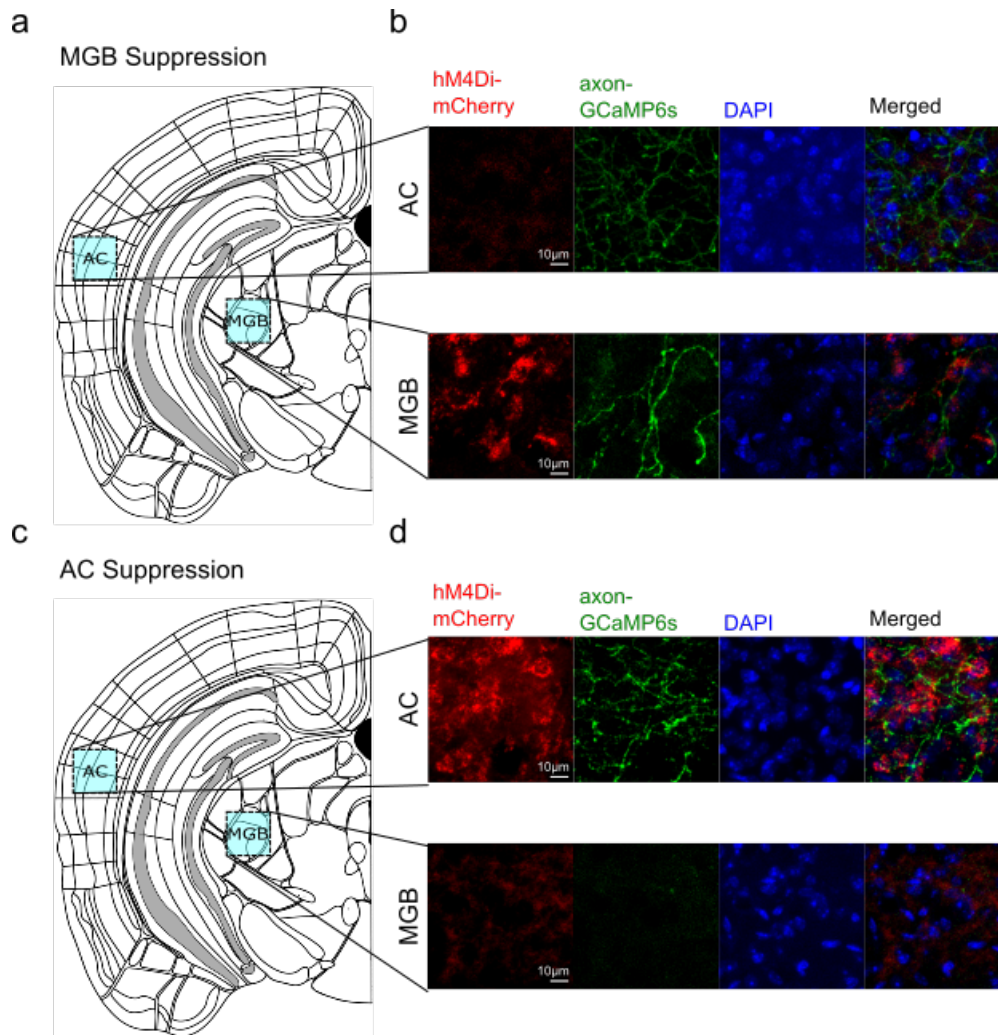

780

781 **Supplementary Fig. 8** Histology for medial geniculate body and auditory cortex  
782 DREADDs targeting. **(a)** Schematic of imaging site for auditory cortex (AC) and medial  
783 geniculate body (MGB) in MGB suppression mice. **(b)** Top: auditory cortex stained for  
784 inhibitory DREADDs hM4Di (red), axon-GCaMP6s (green), and DAPI. Bottom: medial  
785 geniculate body stained for inhibitory DREADDs hM4Di (red), axon-GCaMP6s (green),  
786 and DAPI. Histology is validated in 4 experimental animals. **(c)** Schematic of imaging  
787 site for auditory cortex (AC) and medial geniculate body (MGB) in AC suppression mice.  
788 **(d)** Top: auditory cortex stained for inhibitory DREADDs hM4Di (red), axon-GCaMP6s  
789 (green), and DAPI. Bottom: medial geniculate body stained for inhibitory DREADDs  
790 hM4Di (red), axon-GCaMP6s (green), and DAPI. Histology is validated in 2  
791 experimental animals.

792

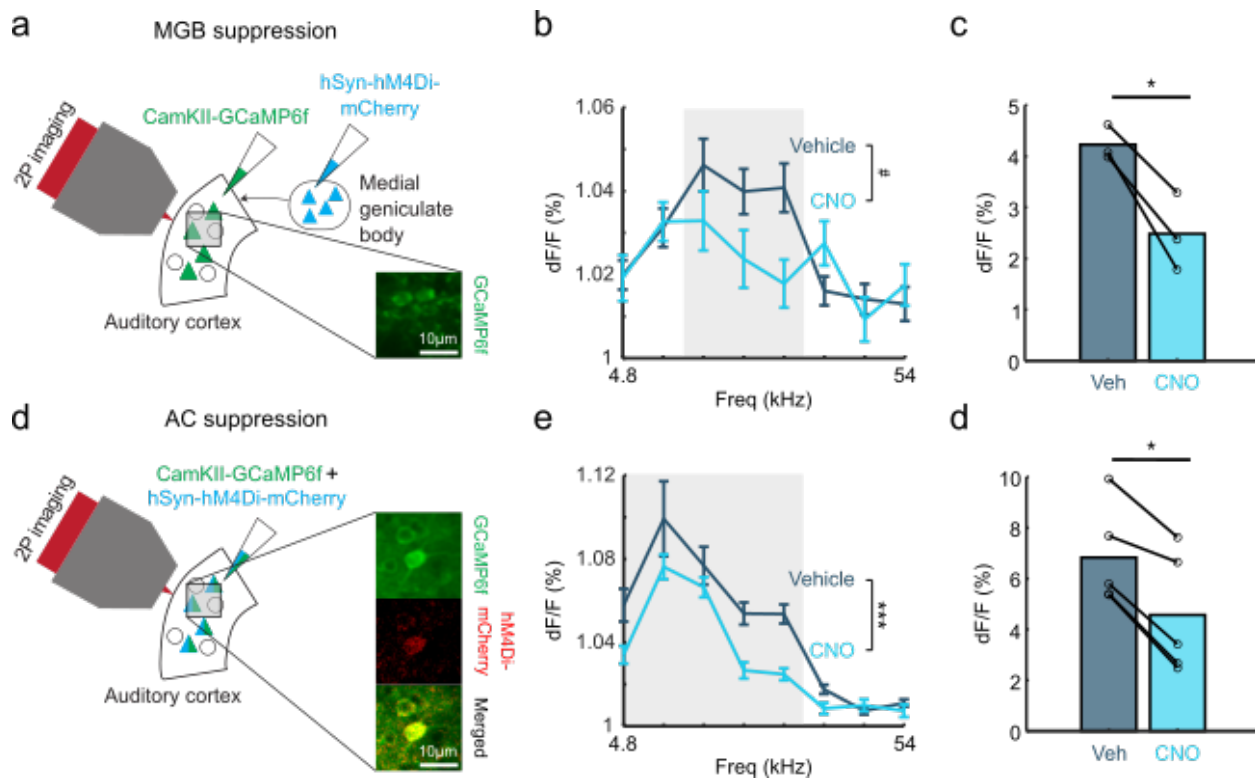

793

794 **Supplementary Fig. 9** Chemogenetic suppression of auditory thalamus and auditory  
 795 cortex attenuates sound-evoked cortical responses. **(a)** Schematic of injection strategy  
 796 for suppression of the medial geniculate body. Inset: cortical neurons expressing  
 797 GCaMP6f (green) **(b)** Evoked cortical response to pure tones after intraperitoneal saline  
 798 and CNO injection ( $n = 95$  cells for saline condition;  $n = 55$  cells for CNO condition,  
 799  $F(1,1184) = 3.57$ ,  $p = 0.0589$ ). Shaded region significantly responsive tones identified  
 800 post saline injection (9.5-18kHz). **(c)** Mean evoked response after intraperitoneal saline  
 801 and CNO injection for each significantly responsive tone,  $p < 0.05$ . **(d)** Schematic of  
 802 injection strategy for suppression of the auditory cortex. Inset: cortical neurons  
 803 expressing GCaMP6f (green), inhibitory DREADDs hM4Di (red) and overlaid image. **(e)**  
 804 Evoked cortical response to pure tones after intraperitoneal saline and CNO injection ( $n$   
 805  $= 232$  cells for saline condition;  $n = 113$  cells for CNO condition,  $F(1,2744) = 13.34$ ,  
 806  $p < 0.001$ ). Shaded region represents significantly responsive tones identified post saline  
 807 injection (4.8-19kHz). **(f)** Mean evoked response after intraperitoneal saline and CNO  
 808 injection for each significantly responsive tone,  $p < 0.05$ .

809

810

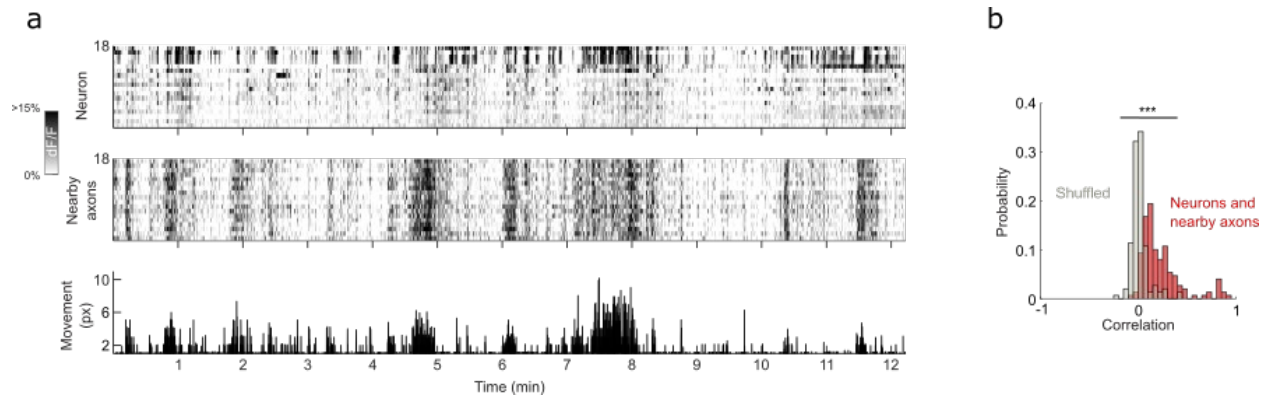

811

812 **Supplementary Fig. 10** Strong coupling between local tonic cholinergic activity and  
813 tonic cortical neuron activity. (a) Fluorescence activity of neurons in one example  
814 recording site (top) and the nearby axons of the respective neurons (middle) and  
815 movement of the animal during the recording session (bottom). (b) Histogram of  
816 correlation coefficient of cell tonic activity and tonic activity of nearby axons (red)  
817 compared to shuffled data (gray),  $p < 0.001$ .

818

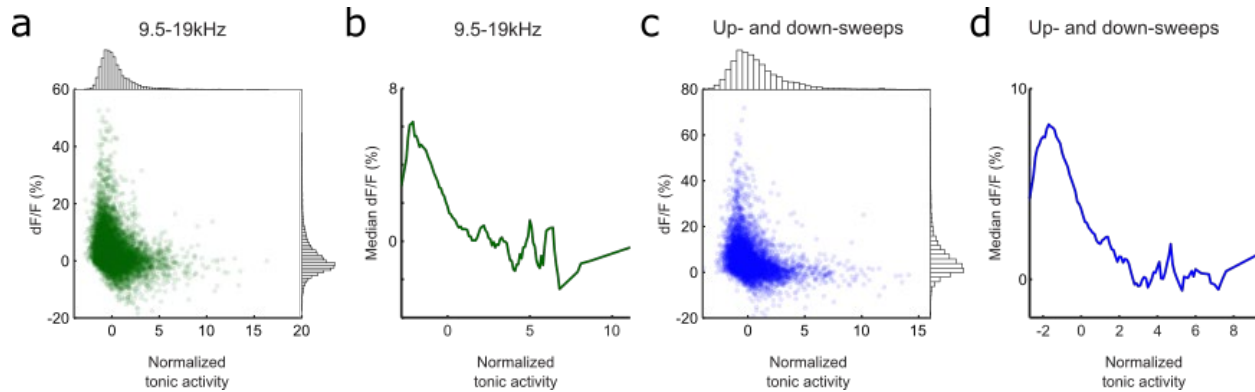

819

820 **Supplementary Fig. 11** State-dependent tonic cholinergic activity modulates cholinergic  
821 response to pure tones and up- and down-sweeps. (a) Scatterplot of mean evoked  
822 response to 9.5-19kHz at different tonic cholinergic baseline. Histogram for normalized  
823 tonic activity (top) and evoked response (right). (b) Median evoked response to 9.5-19kHz  
824 across entire dynamic range of tonic activity. (c) Scatterplot of mean evoked response to  
825 up- and down-sweeps at different tonic cholinergic baseline. Histogram for normalized  
826 tonic activity (top) and evoked response (right). (d) Median evoked response to up- and  
827 down-sweeps across entire dynamic range of tonic activity.

828
